# Supplementary material for: Anti-Ovarian Cancer Conotoxins Identified from Conus Venom
Source: MDPI journal article supplement (doi:10.3390/molecules27196609), 2022-10-05
Supplement: s1 [file s1]

# Supplemental Material A

## Anti-Ovarian Cancer Conotoxins Identified from *Conus* Venom

Shuang Ju <sup>1</sup>, Yu Zhang <sup>1</sup>, Xijun Guo <sup>1</sup>, Qinghui Yan <sup>1</sup>, Siyi Liu <sup>1</sup>, Bokai Ma <sup>2</sup>, Mei Zhang <sup>2</sup>, Jiaolin Bao <sup>1</sup>, Sulan Luo <sup>1,3</sup> and Ying Fu <sup>1,\*</sup>

- <sup>1</sup> Key Laboratory of Tropical Biological Resources of Ministry of Education, School of Pharmaceutical Sciences, Hainan University, Haikou 570228, China  
<sup>2</sup> Beijing Key Laboratory of Organic Materials Testing Technology & Quality Evaluation, Institute of Analysis and Testing, Beijing Academy of Science and Technology, Beijing 100094, China  
<sup>3</sup> Medical School, Guangxi University, Nanning 530004, China

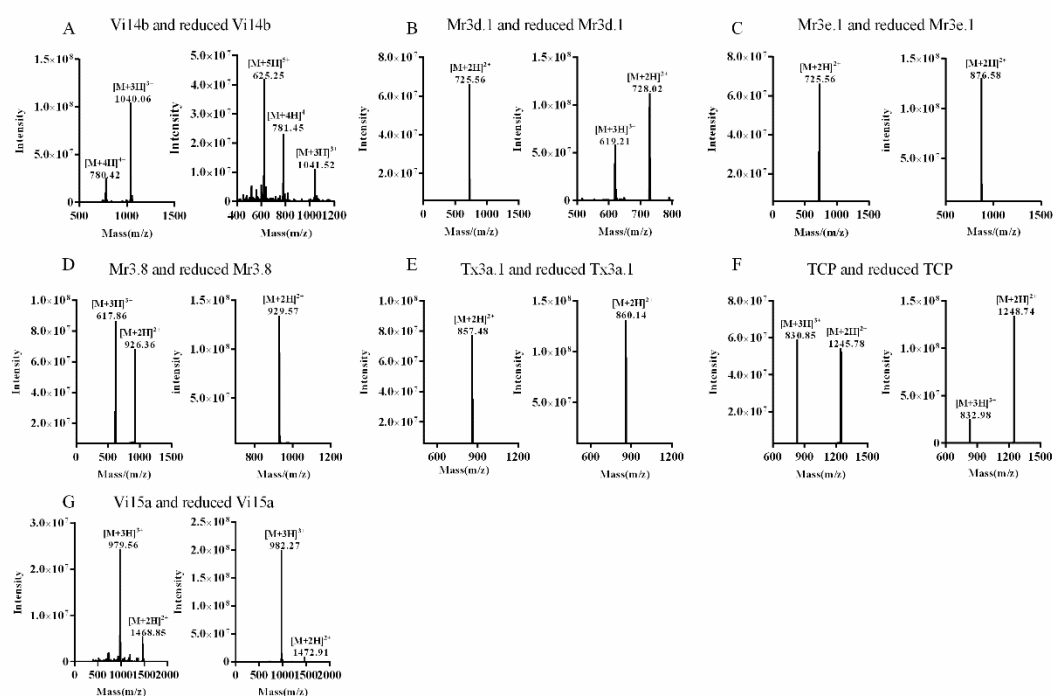

**Figure S1.** Primary mass spectra of Vi14b, Mr3d.1, Mr3e.1, Mr3.8, Tx3a.1, TCP, Vi15a before and after total reduction.

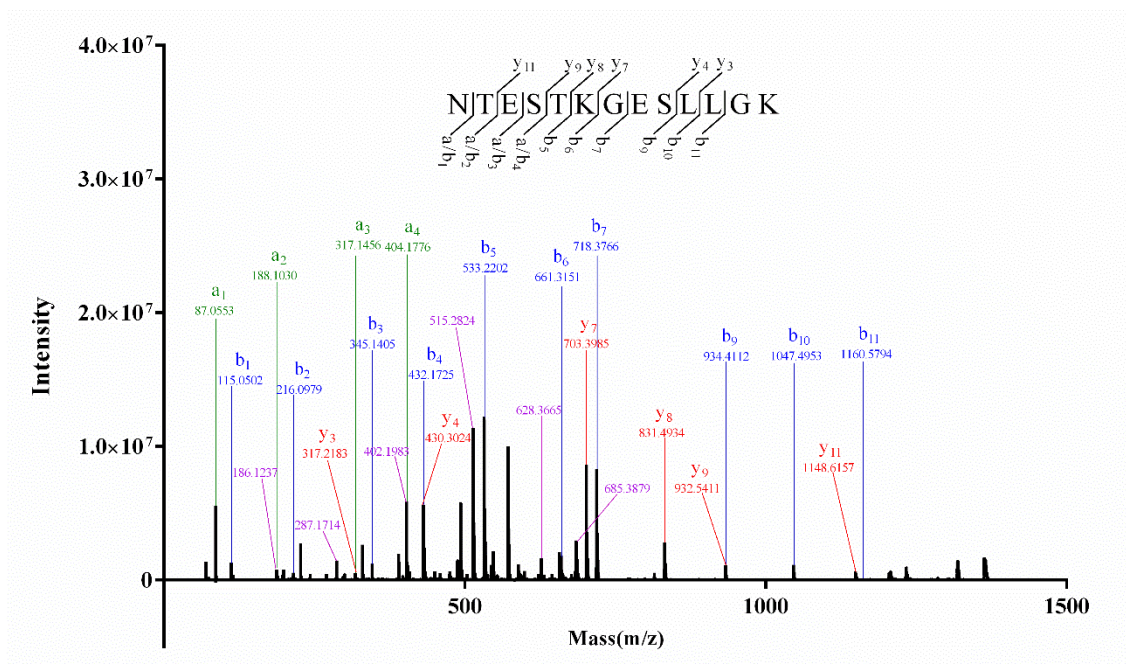

Figure S2. MALDI-TOF-MS/MS spectrum of Vi003 sequencing.

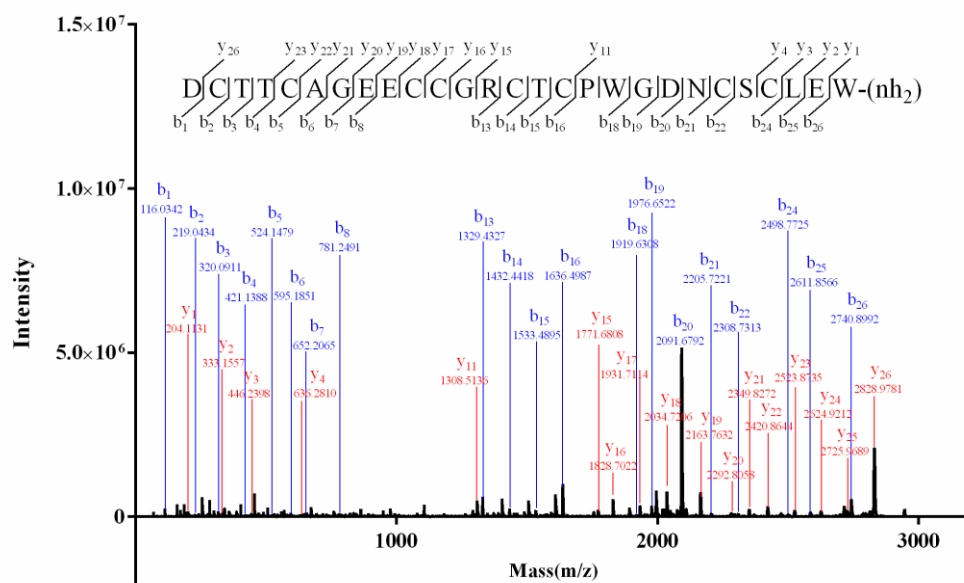

Figure S3. MALDI-TOF-MS/MS spectrum of Vi15a sequencing.

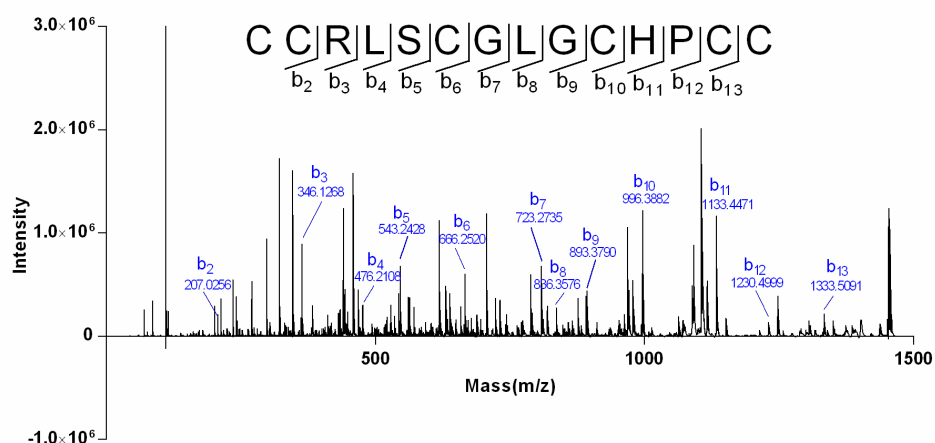

Figure S4. MALDI-TOF-MS/MS spectrum of Mr3d.1 sequencing.

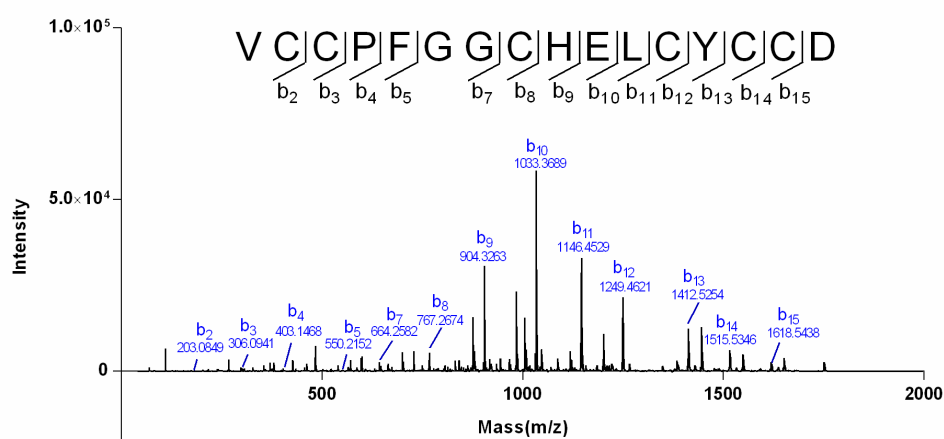

Figure S5. MALDI-TOF-MS/MS spectrum of Mr3e.1 sequencing.

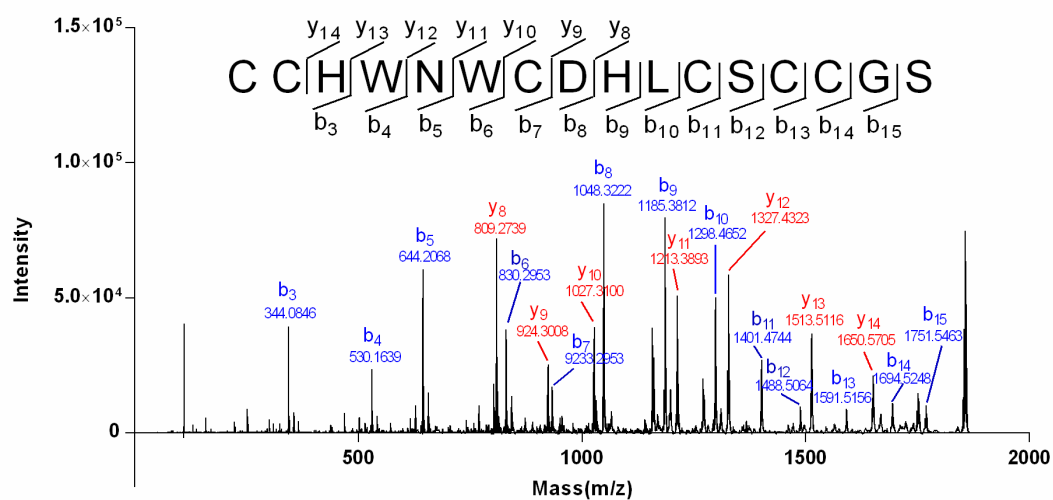

Figure S6. MALDI-TOF-MS/MS spectrum of Mr3.8 sequencing.

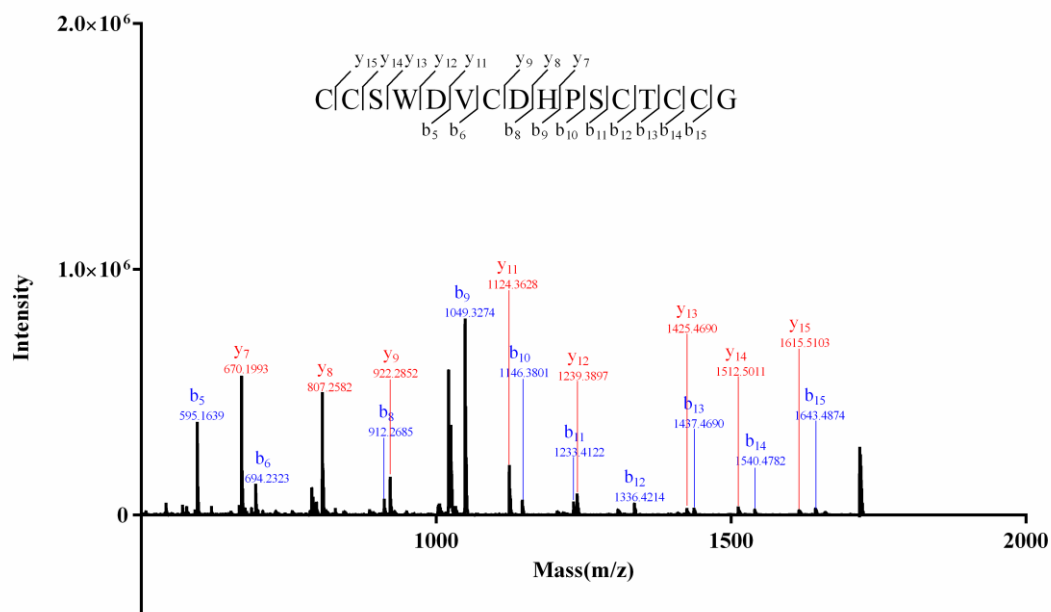

Figure S7. MALDI-TOF-MS/MS spectrum of Tx3a.1 sequencing.

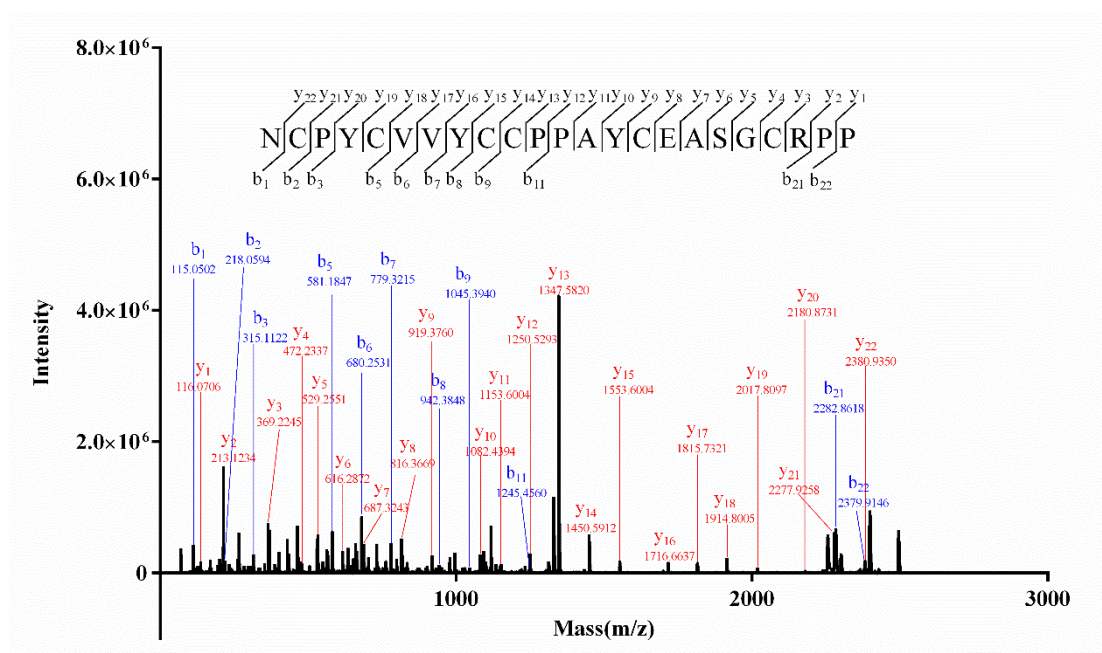

Figure S8. MALDI-TOF-MS/MS spectrum of TCP sequencing.

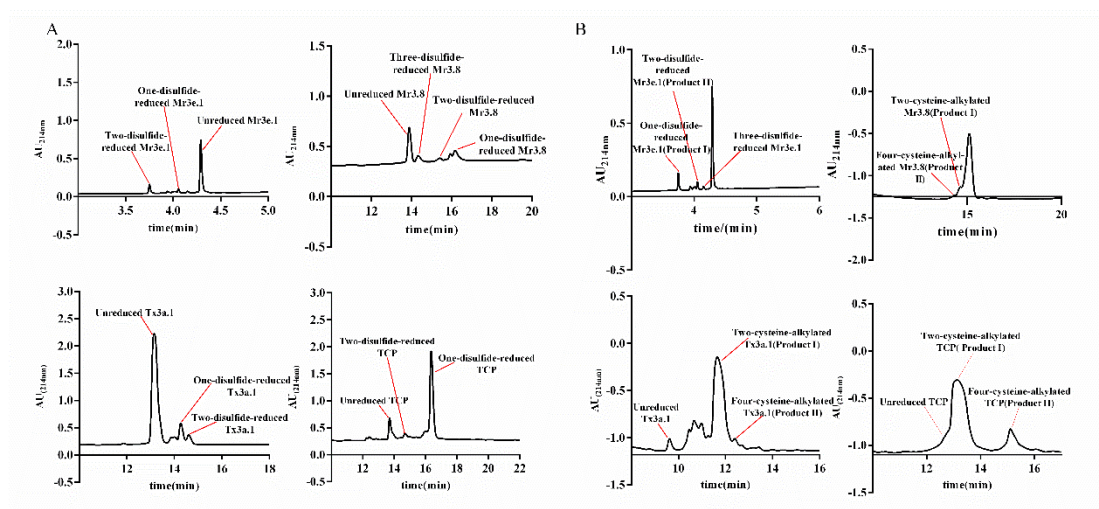

**Figure S9.** HPLC analysis of stepwise reduction by TCEP and follow-up alkylation by IAM. **(A)** Stepwise reduction products of Mr3e.1, Mr3.8, Tx3a.1 and TCP. **(B)** Alkylated products of stepwise-reduced Mr3e.1, Mr3.8, Tx3a.1 and TCP.

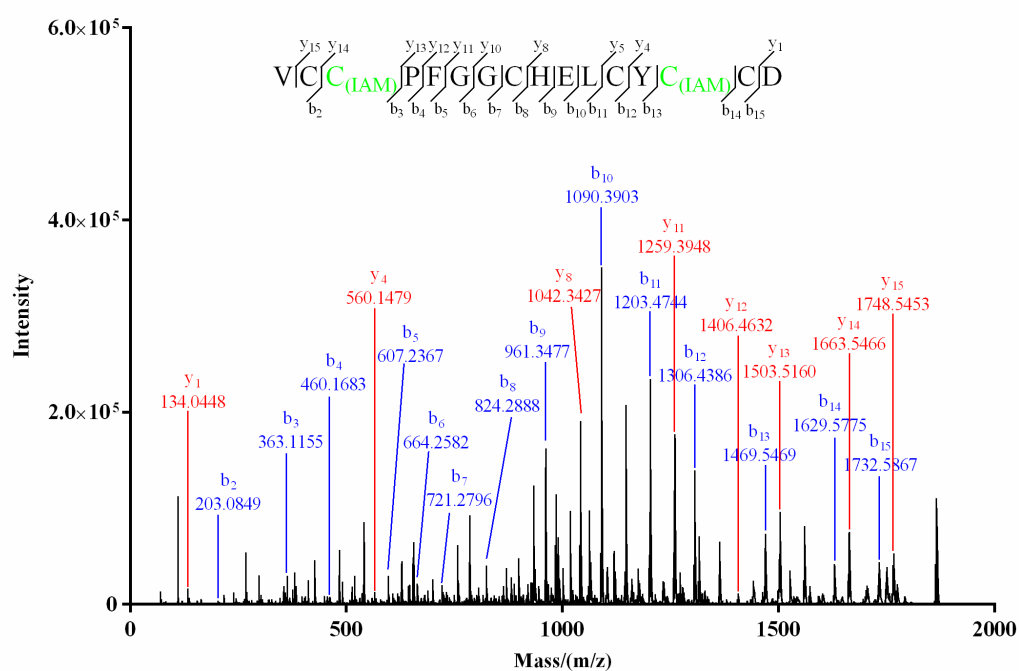

**Figure S10.** MALDI-TOF-MS/MS spectrum of product I of Mr3e.1.

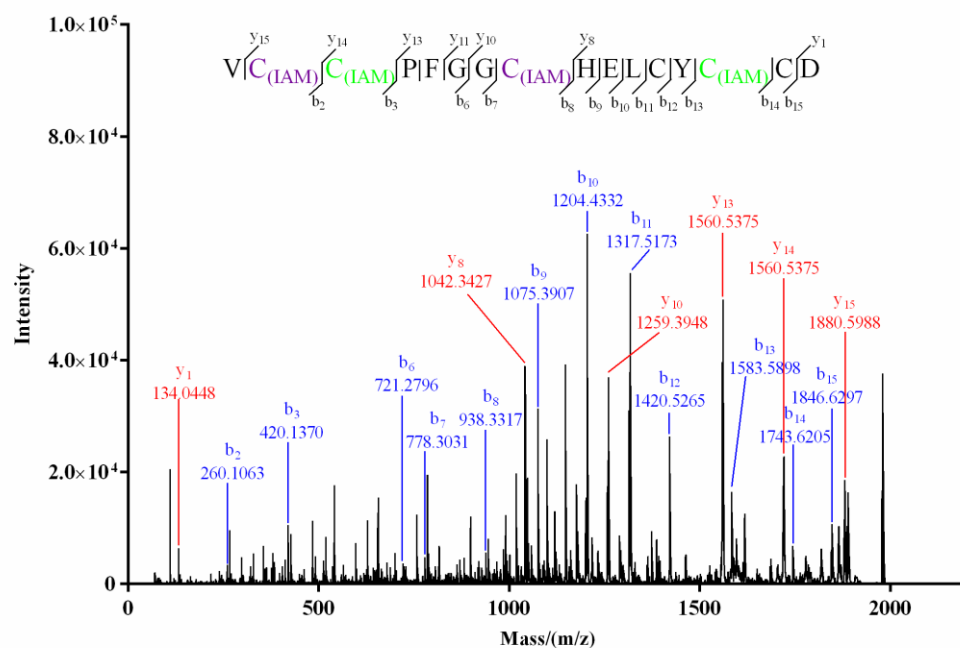

Figure S11. MALDI-TOF-MS/MS spectrum of product II of Mr3e.1.

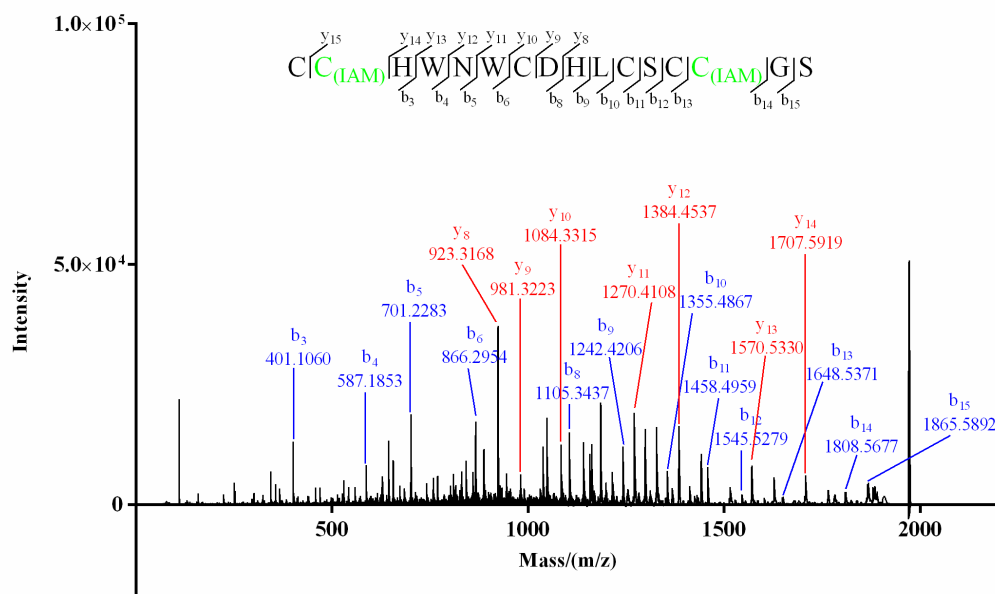

Figure S12. MALDI-TOF-MS/MS spectrum of product I of Mr3.8.

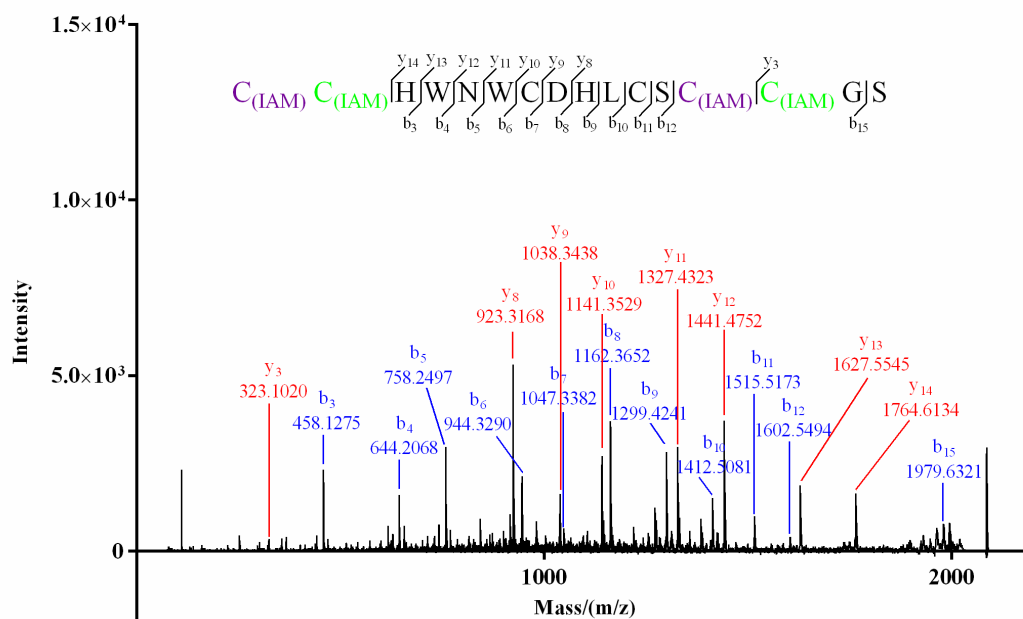

Figure S13. MALDI-TOF-MS/MS spectrum of product II of Mr3.8.

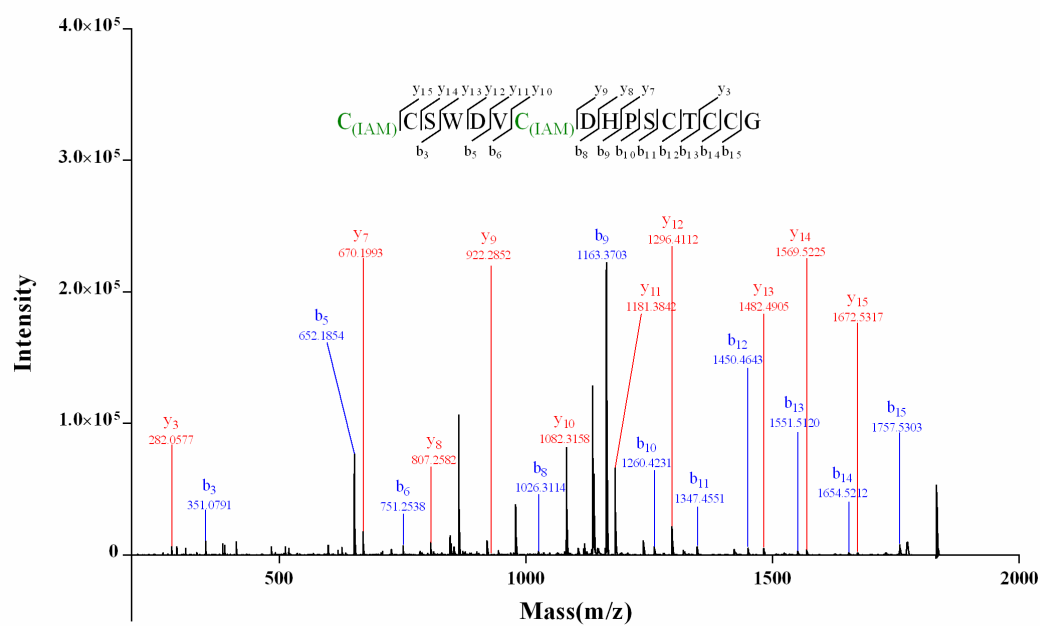

Figure S14. MALDI-TOF-MS/MS spectrum of product I of Tx3a.1.

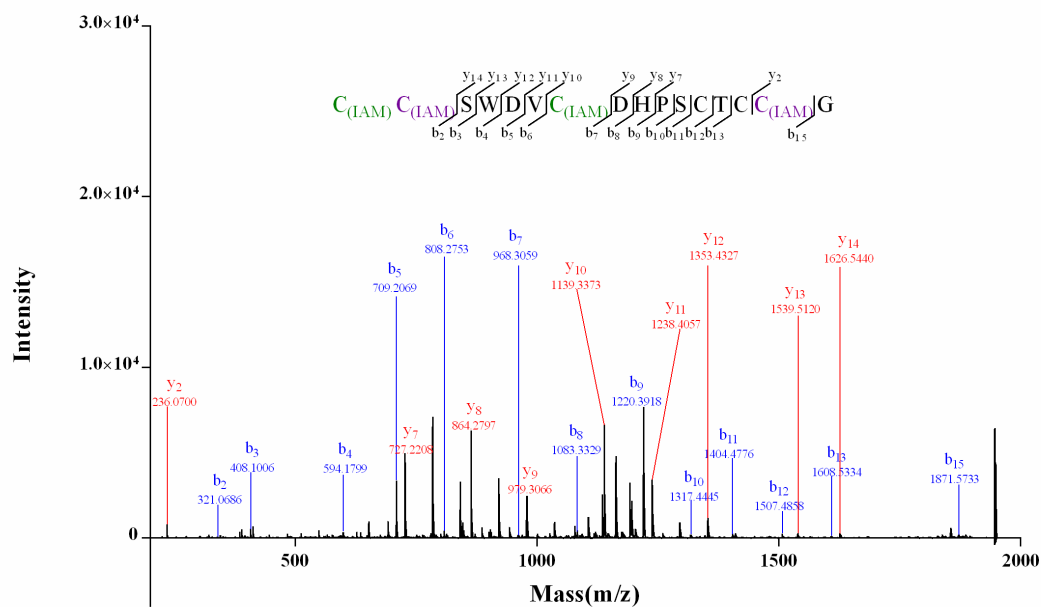

Figure S15. MALDI-TOF-MS/MS spectrum of product II of Tx3a.1.

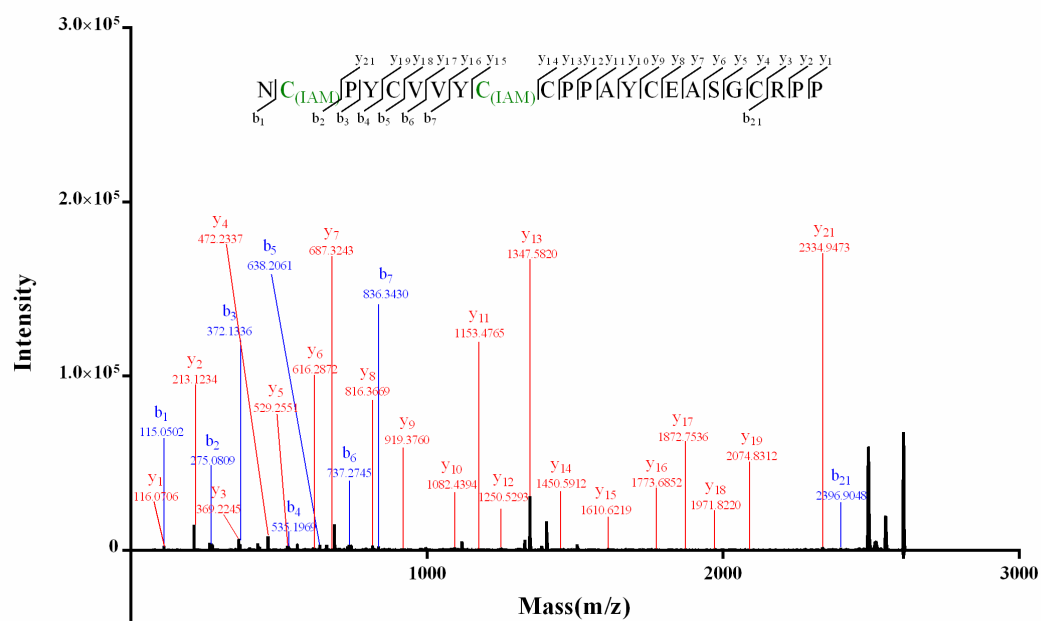

Figure S16. MALDI-TOF-MS/MS spectrum of product I of TCP.



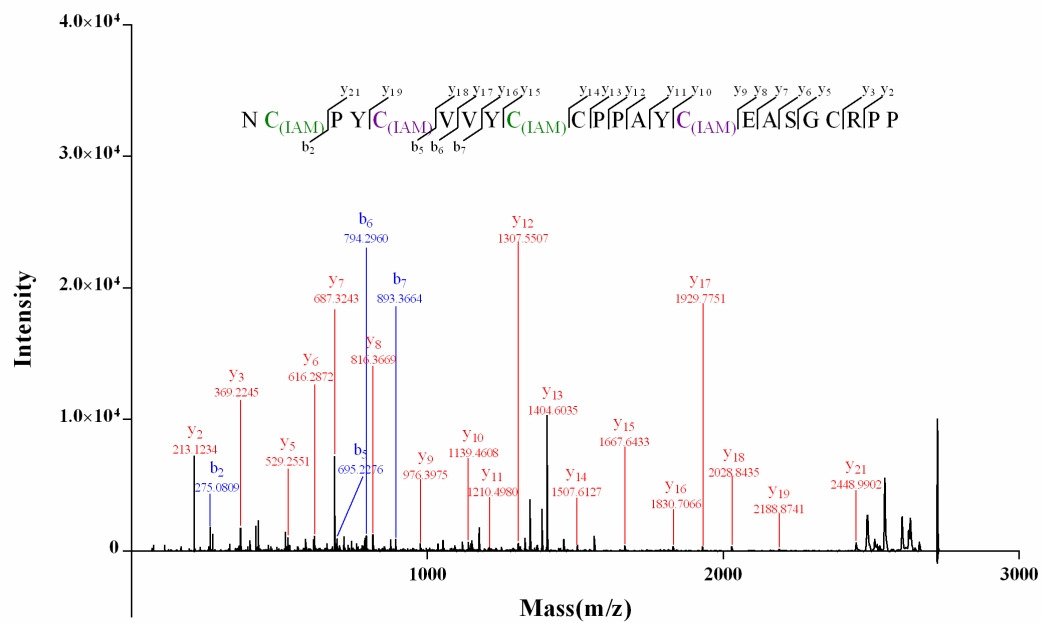

**Figure S17.** MALDI-TOF-MS/MS spectrum of product II of TCP.
