# Supplementary material for: Anti-Ovarian Cancer Conotoxins Identified from Conus Venom
Source: MDPI journal article supplement (doi:10.3390/molecules27196609), 2022-10-05
Supplement: s1 [file s1]

# *Supplemental Material B*

## Anti-Ovarian Cancer Conotoxins Identified from *Conus* Venom

Shuang Ju <sup>1</sup>, Yu Zhang <sup>1</sup>, Xijun Guo <sup>1</sup>, Qinghui Yan <sup>1</sup>, Siyi Liu <sup>1</sup>, Bokai Ma <sup>2</sup>, Mei Zhang <sup>2</sup>, Jiaolin Bao <sup>1</sup>, Sulan Luo <sup>1,3</sup> and Ying Fu <sup>1,\*</sup>

<sup>1</sup> Key Laboratory of Tropical Biological Resources of Ministry of Education, School of Pharmaceutical Sciences, Hainan University, Haikou 570228, China

<sup>2</sup> Beijing Key Laboratory of Organic Materials Testing Technology & Quality Evaluation, Institute of Analysis and Testing, Beijing Academy of Science and Technology, Beijing 100094, China

<sup>3</sup> Medical School, Guangxi University, Nanning 530004, China

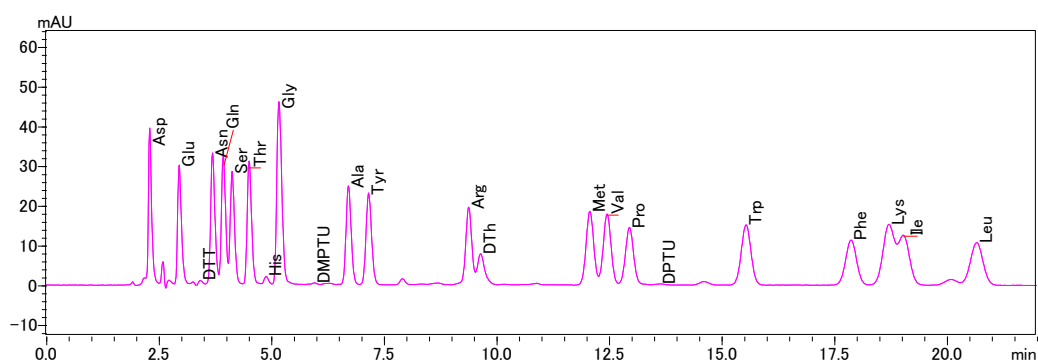

Figure S1. HPLC chromatogram of mixed amino acid standard.

**Table S1.** Retention time of each amino acid in the HPLC chromatogram of the mixed standard

| Constituent | Retention Time<br>(min) |
|-------------|-------------------------|
| Asp         | 2.301                   |
| Glu         | 2.951                   |
| Asn         | 3.699                   |
| Gln         | 3.943                   |
| Ser         | 4.122                   |
| Thr         | 4.512                   |
| His         | 4.903                   |
| Gly         | 5.179                   |
| Ala         | 6.708                   |
| Tyr         | 7.163                   |
| Arg         | 9.398                   |
| Met         | 12.091                  |
| Val         | 12.464                  |
| Pro         | 12.980                  |
| Trp         | 15.530                  |
| Phe         | 17.879                  |
| Lys         | 18.653                  |
| Ile         | 19.054                  |
| Leu         | 20.630                  |

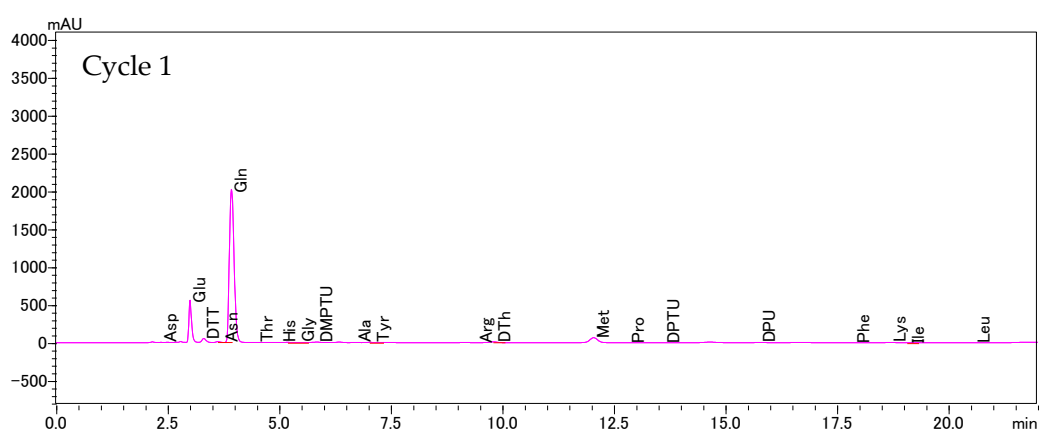

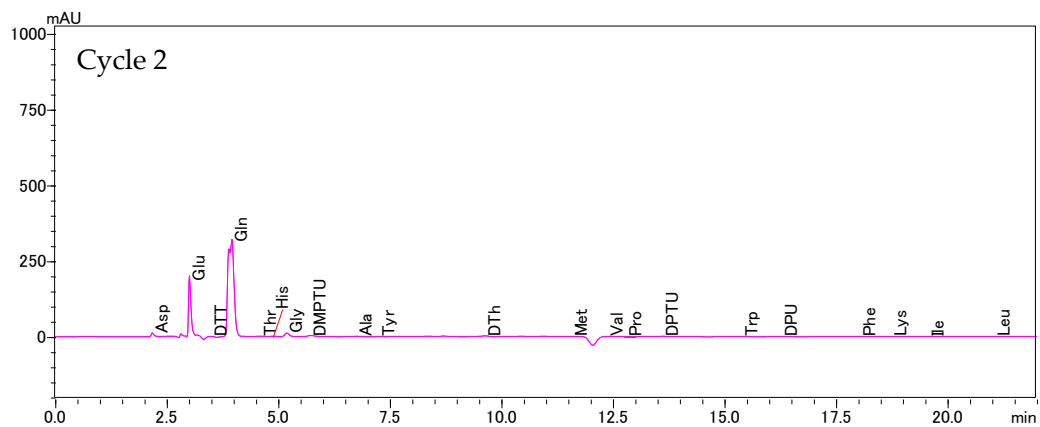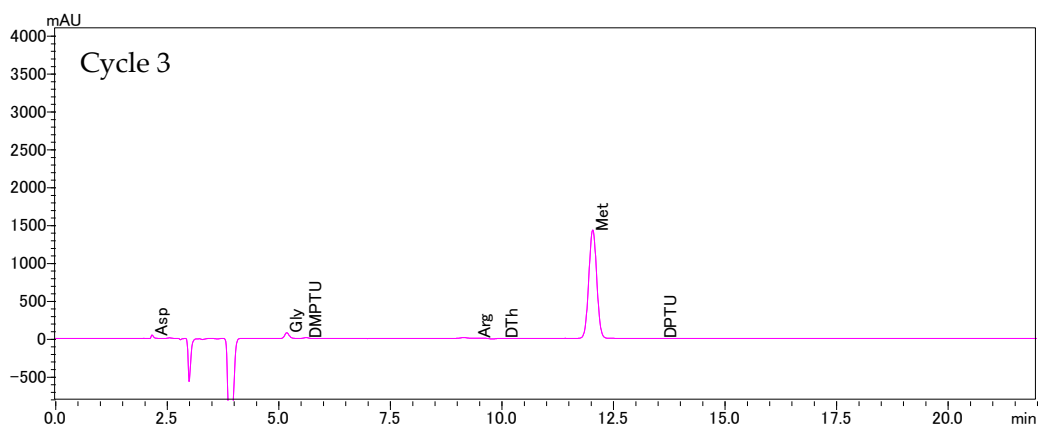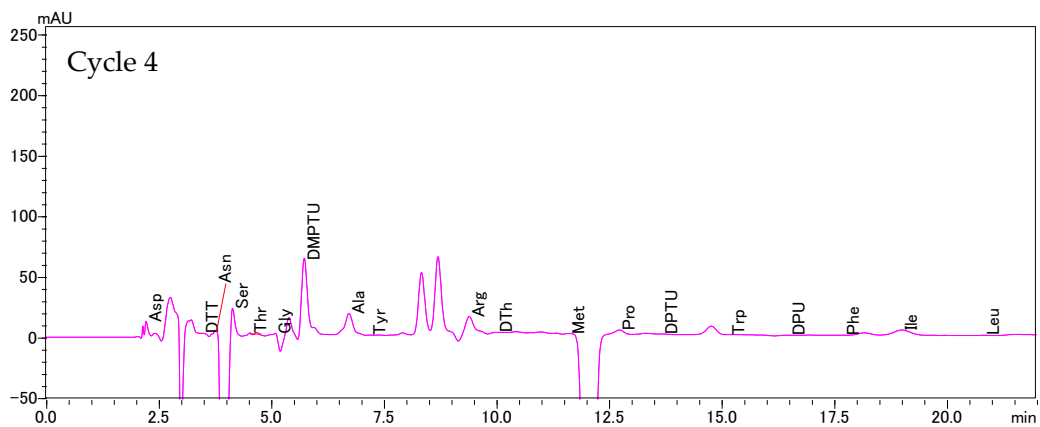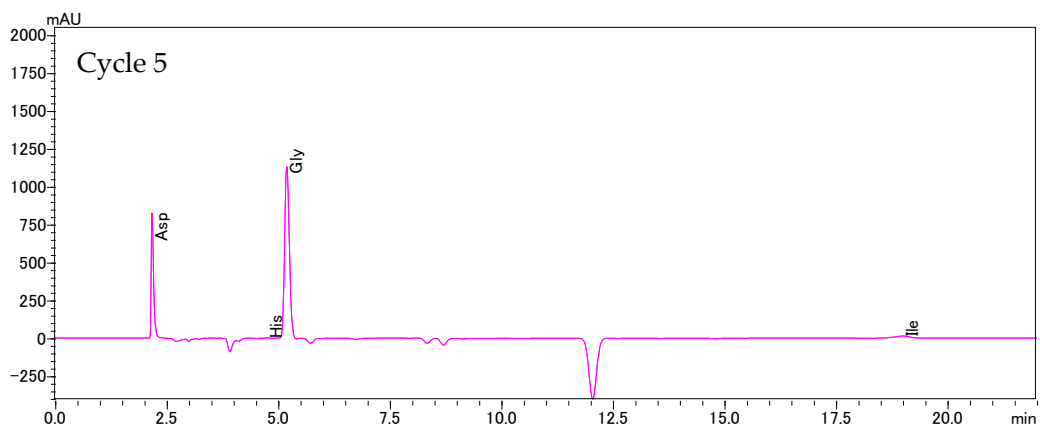

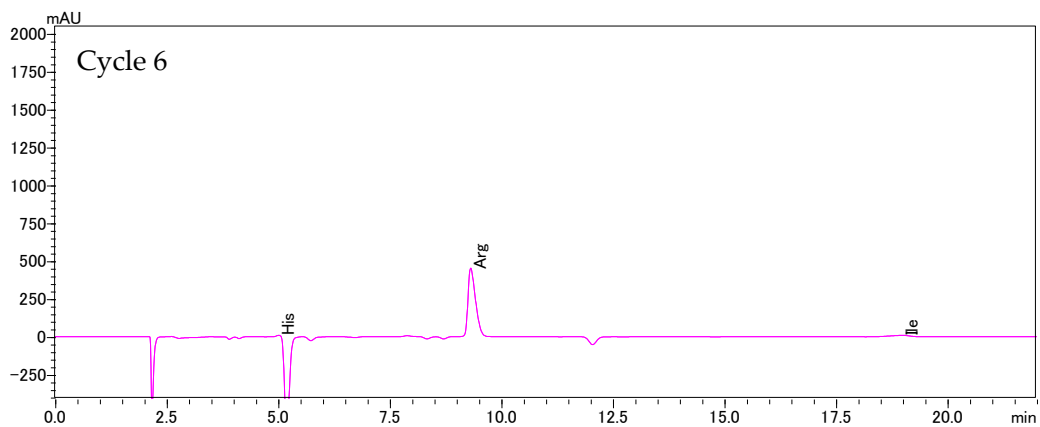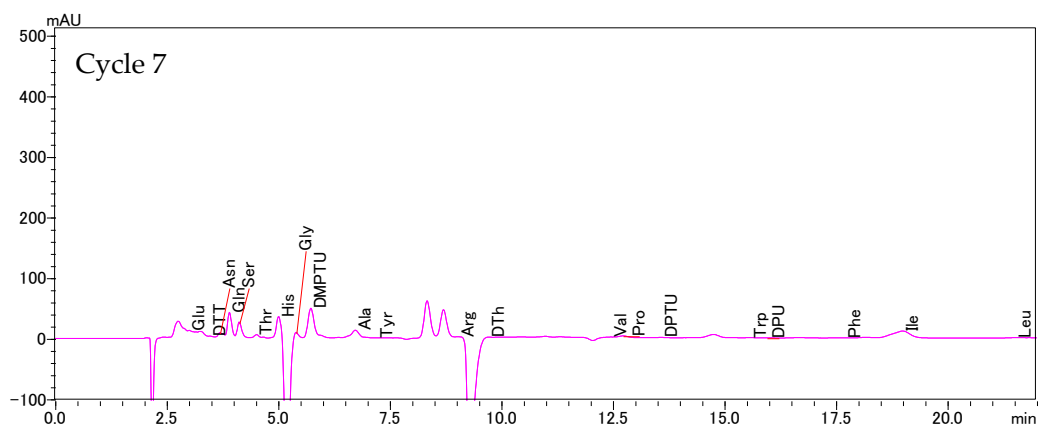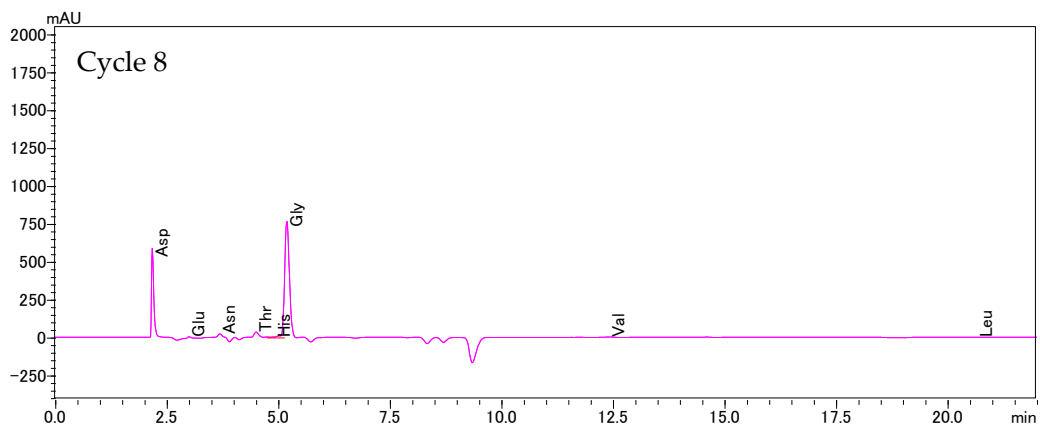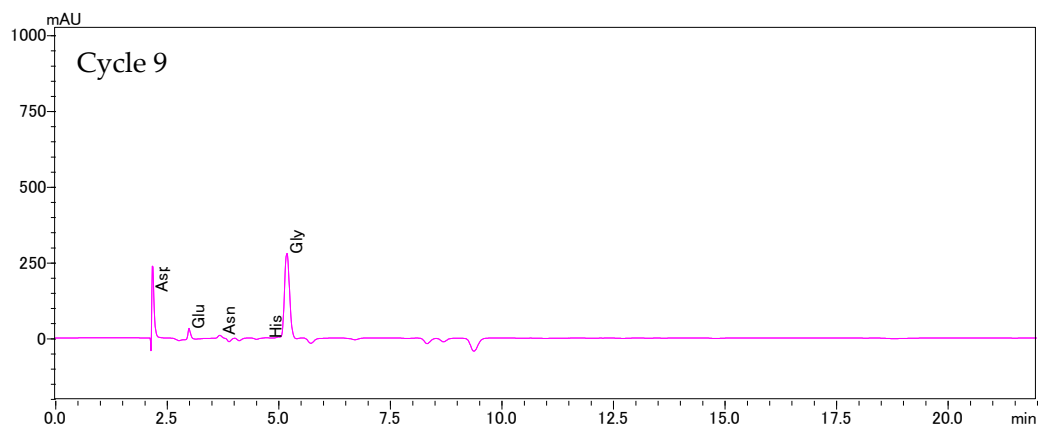

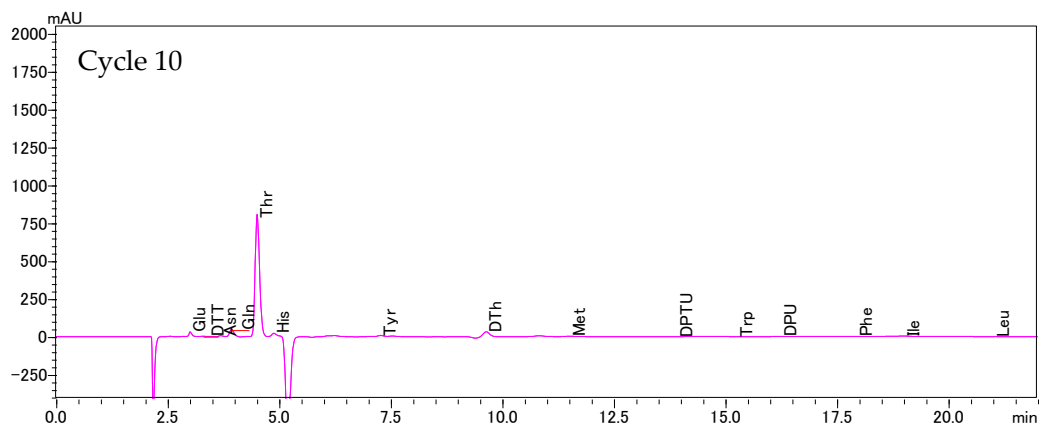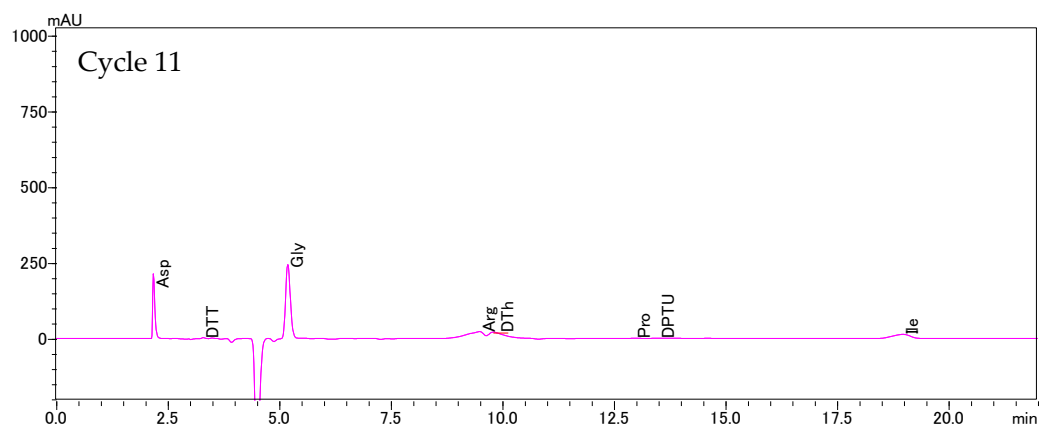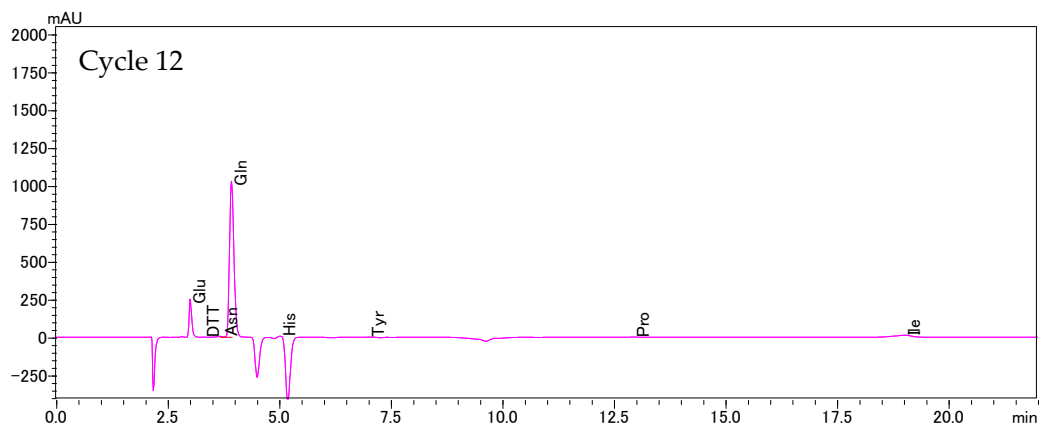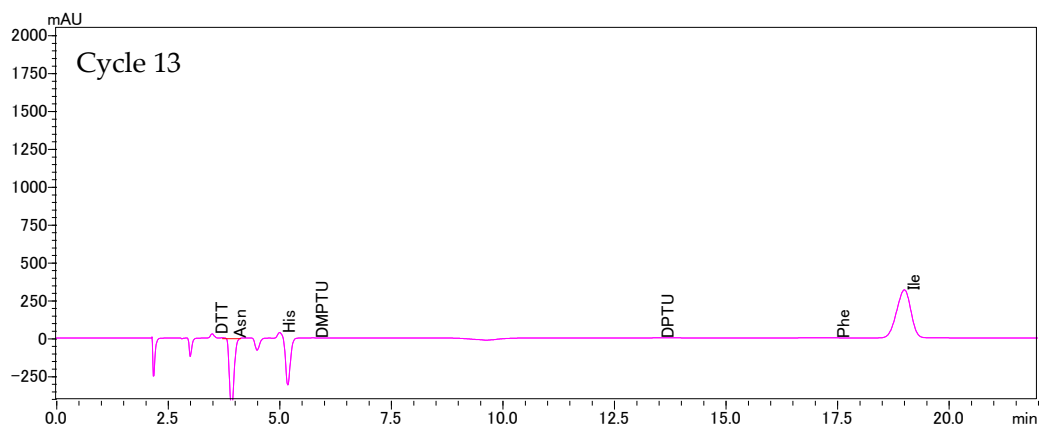

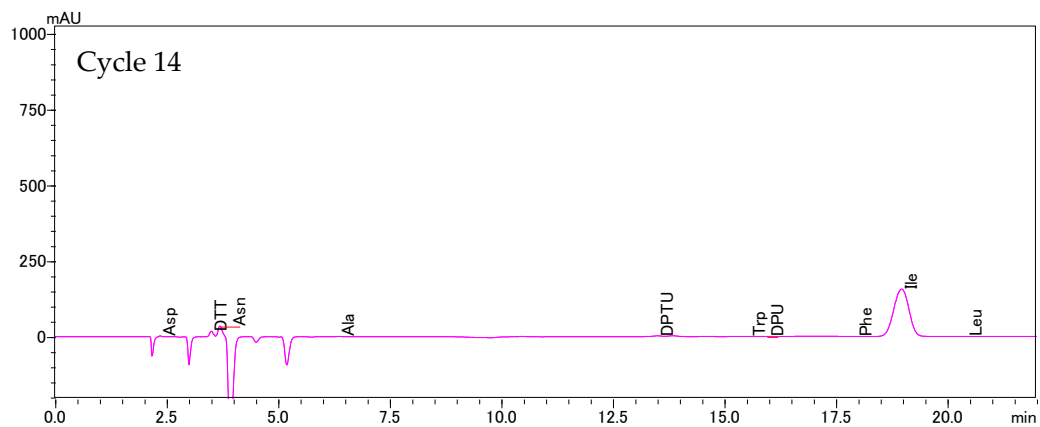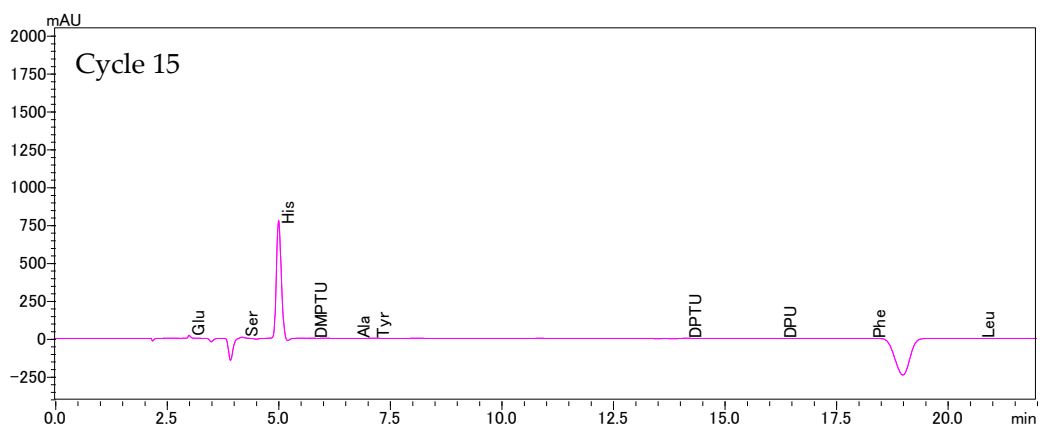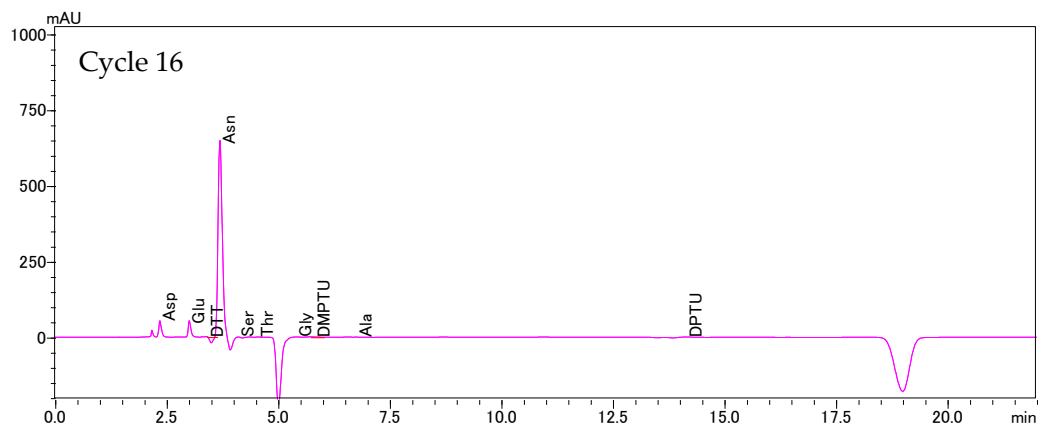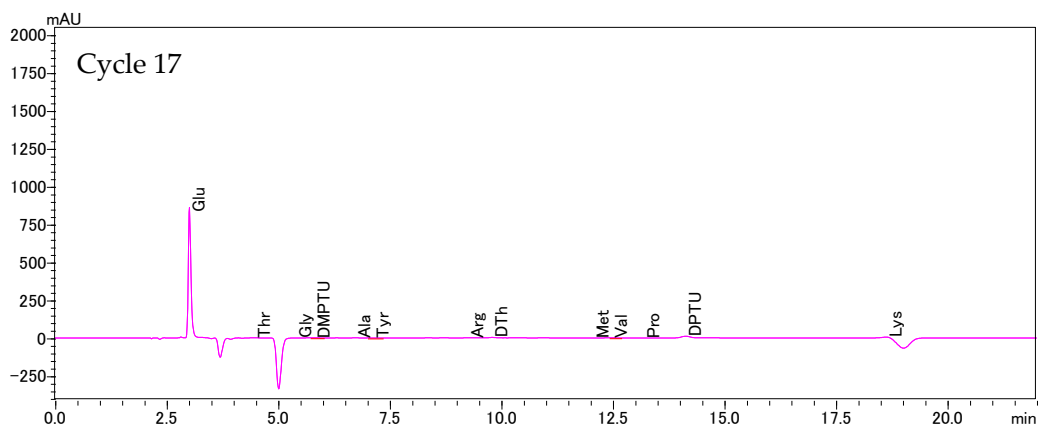

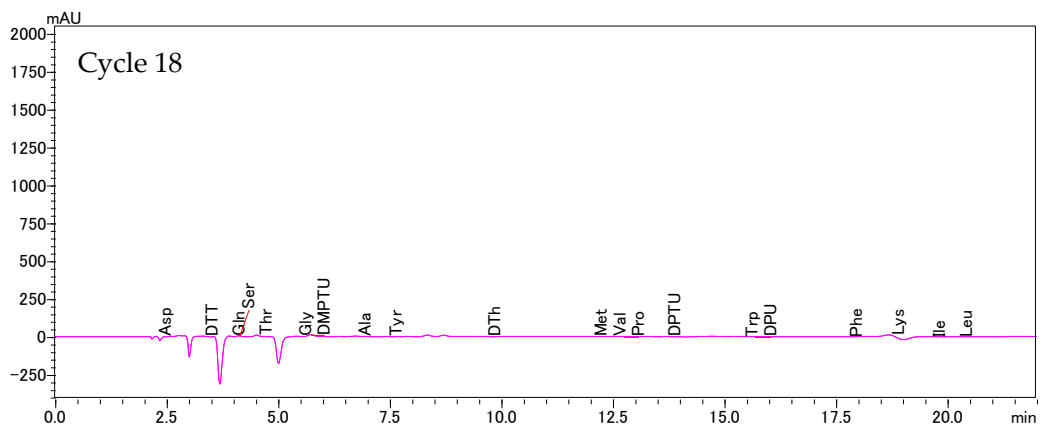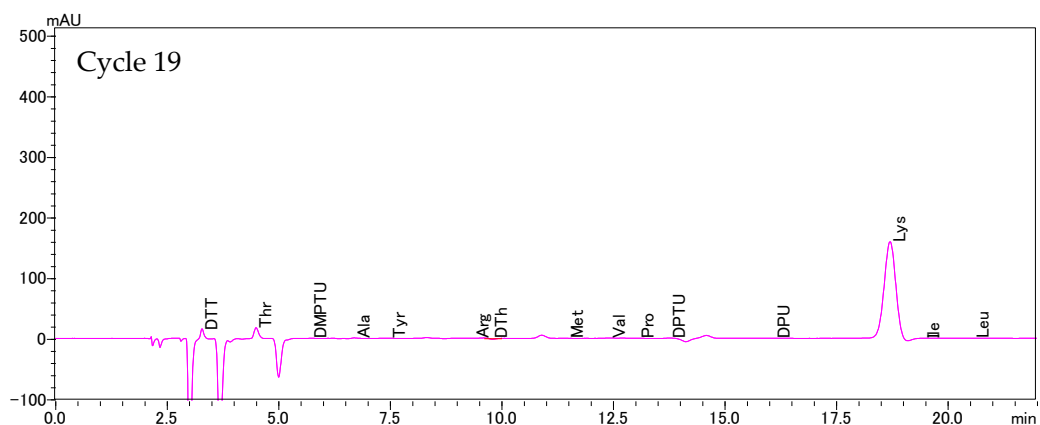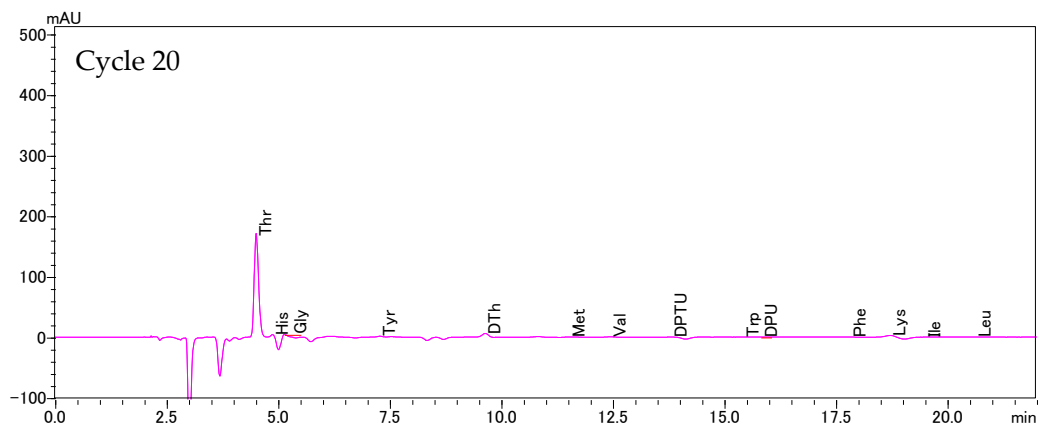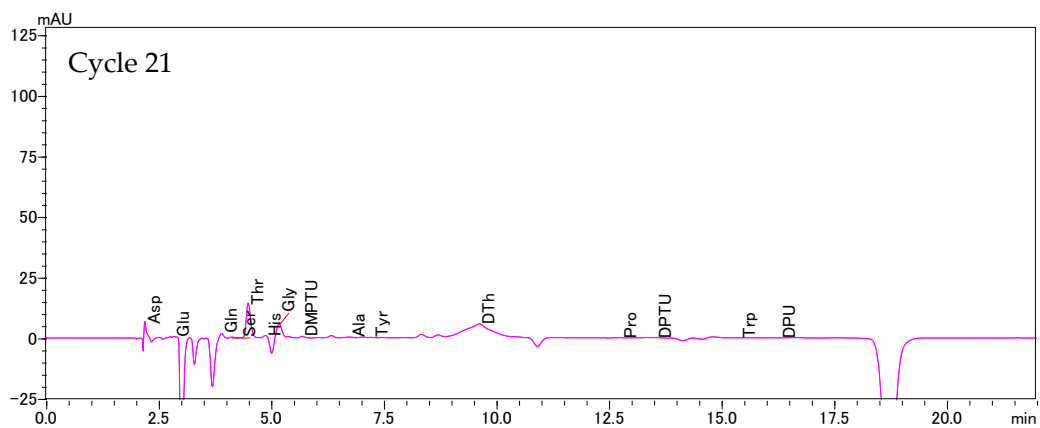

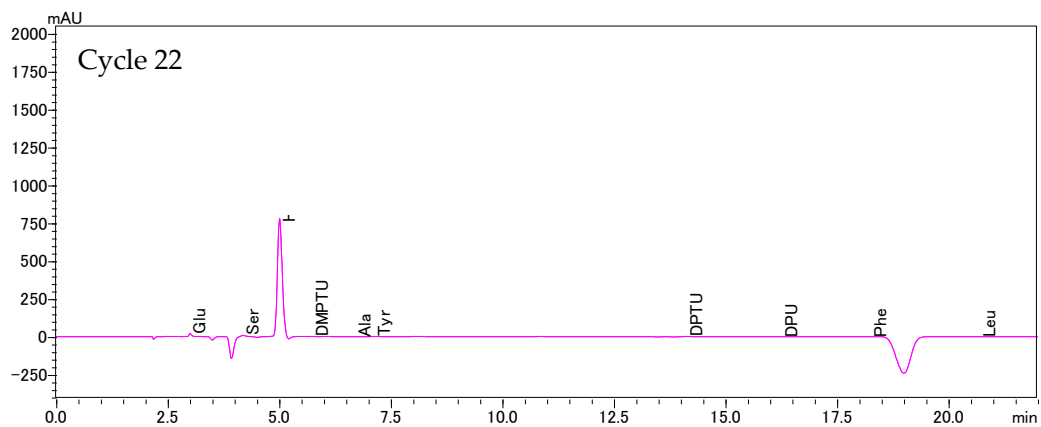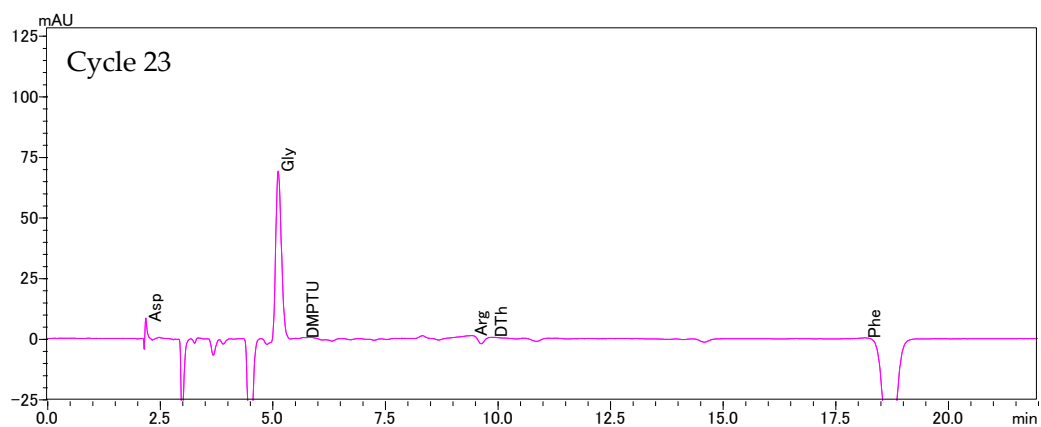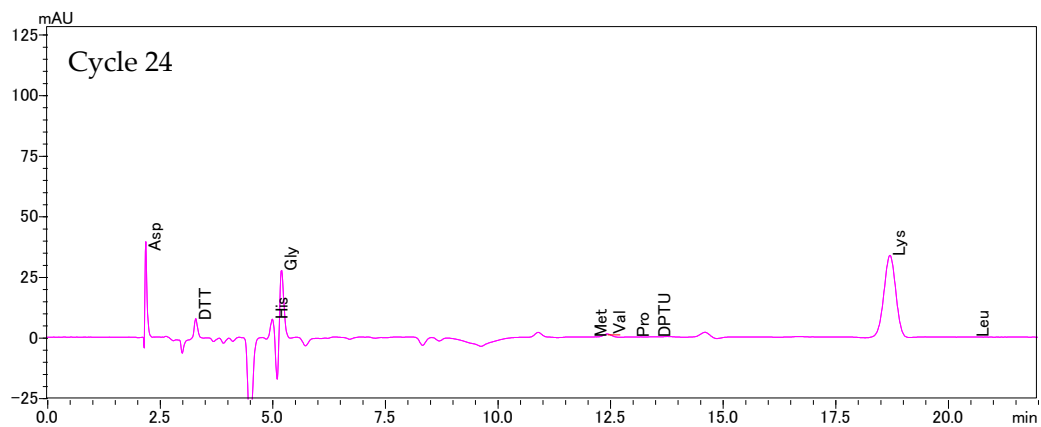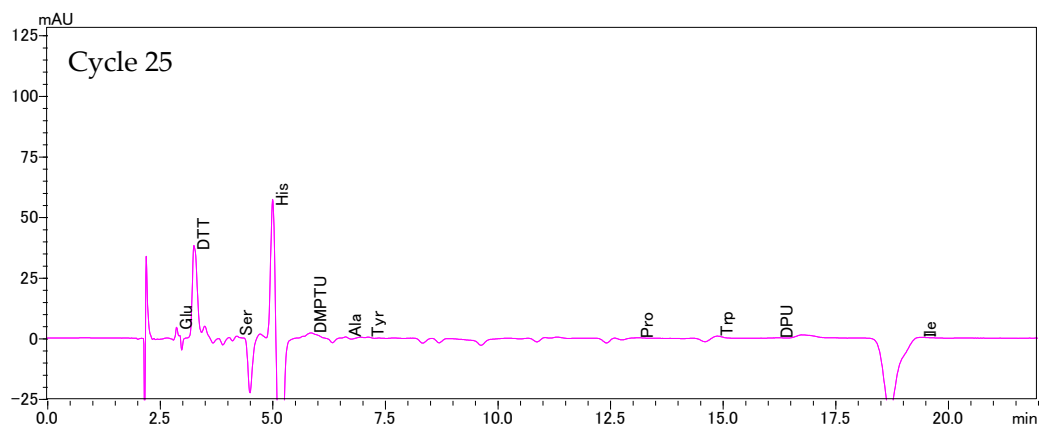



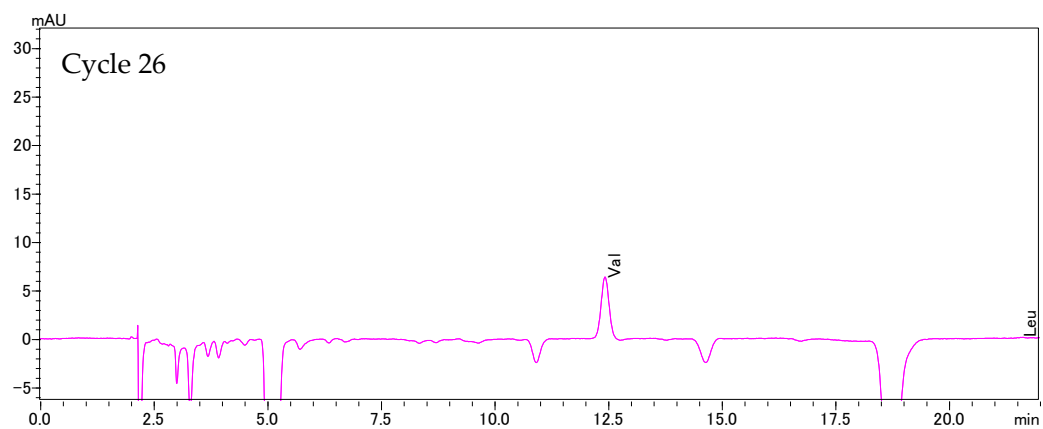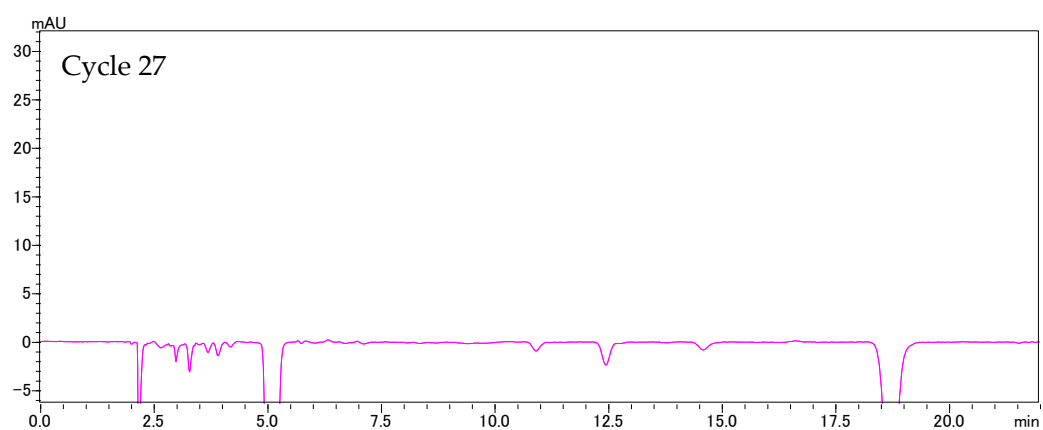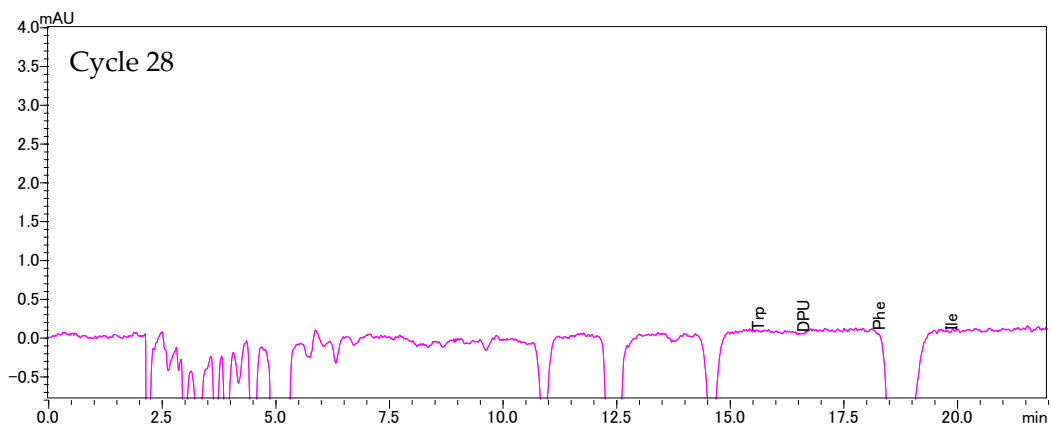

**Figure S2.** HPLC chromatograms of the amino acids released from each Edman degradation cycle of Vi14b.

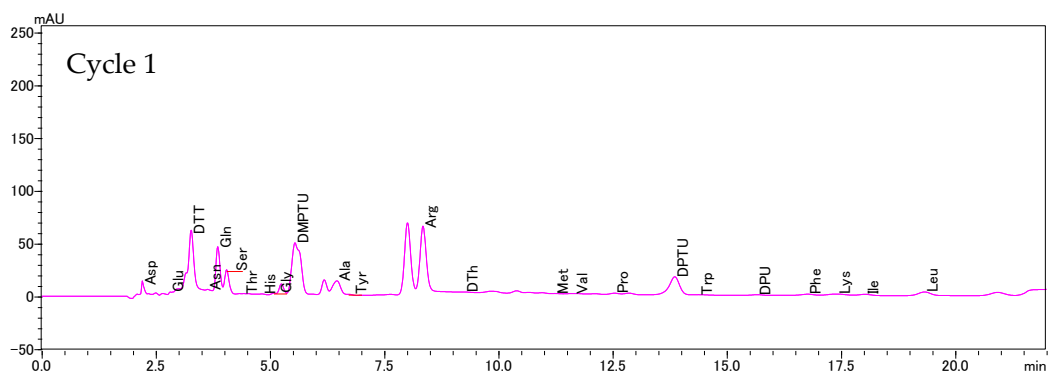

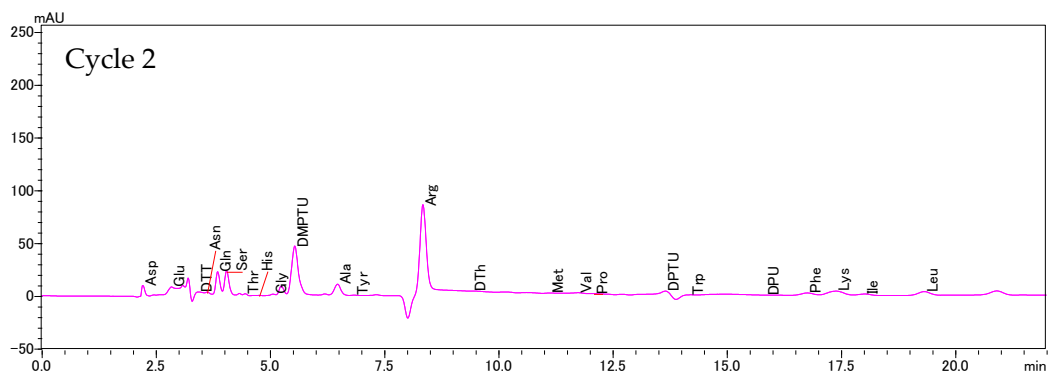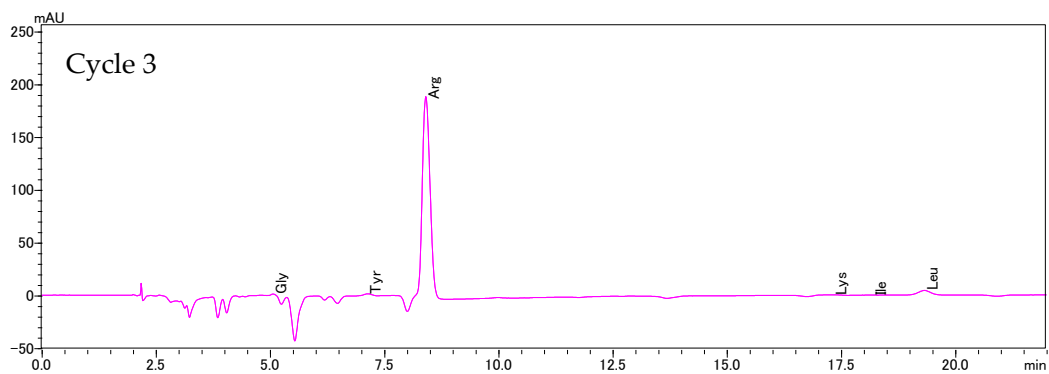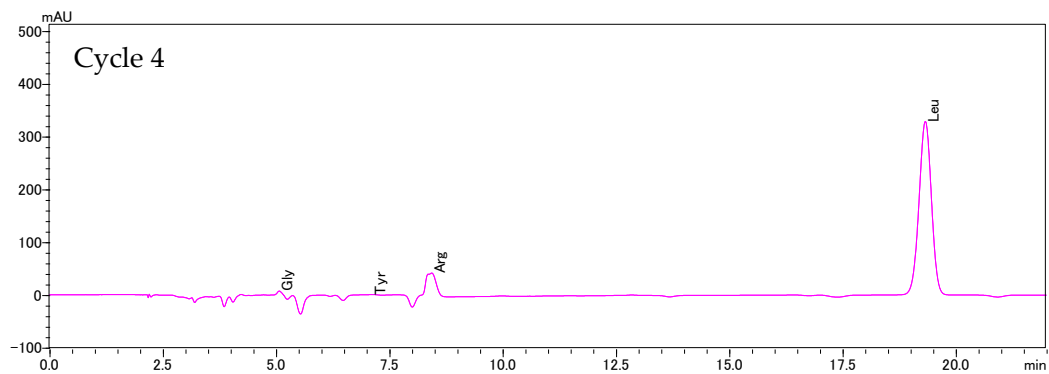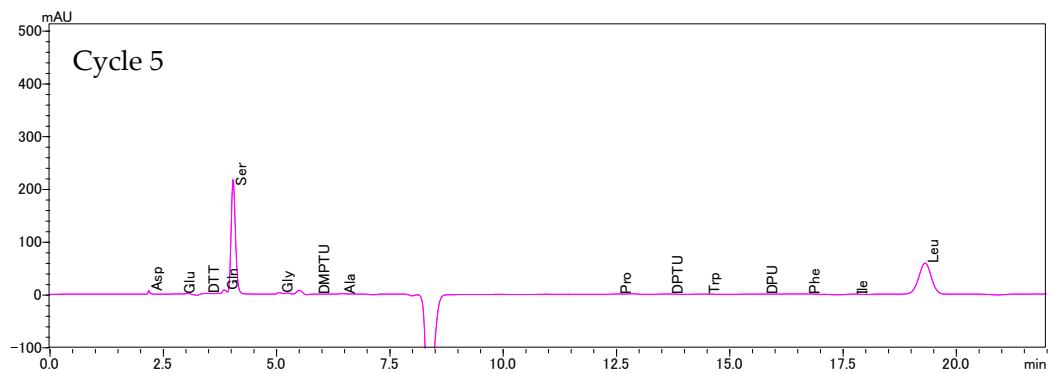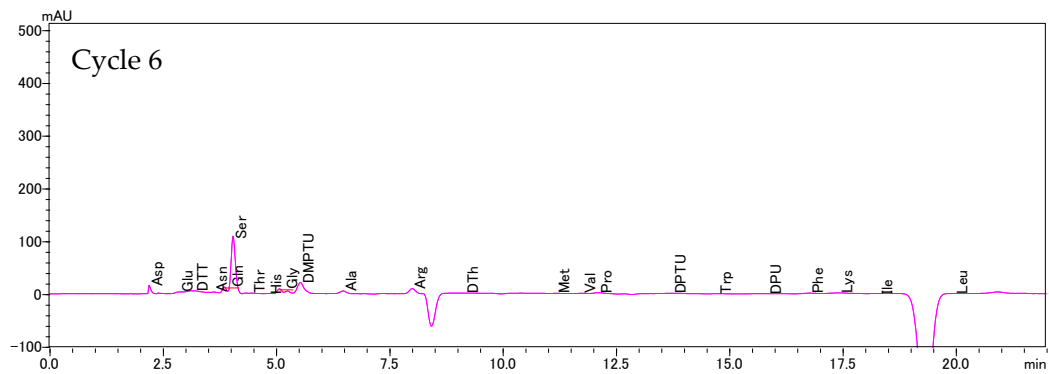

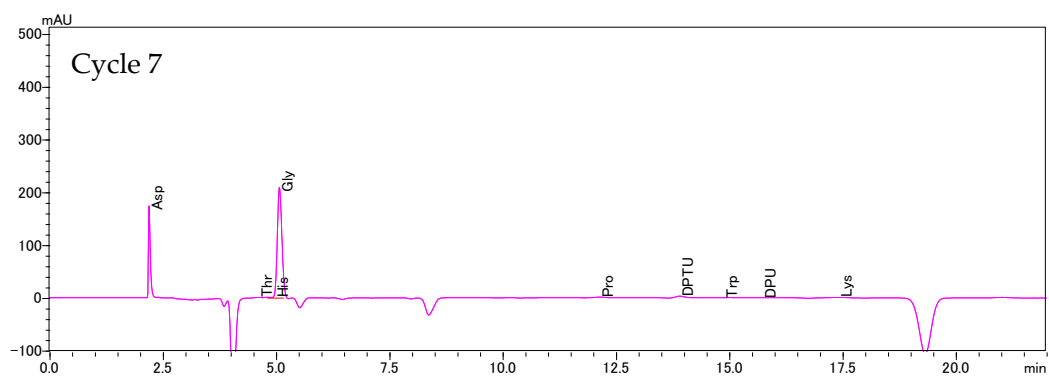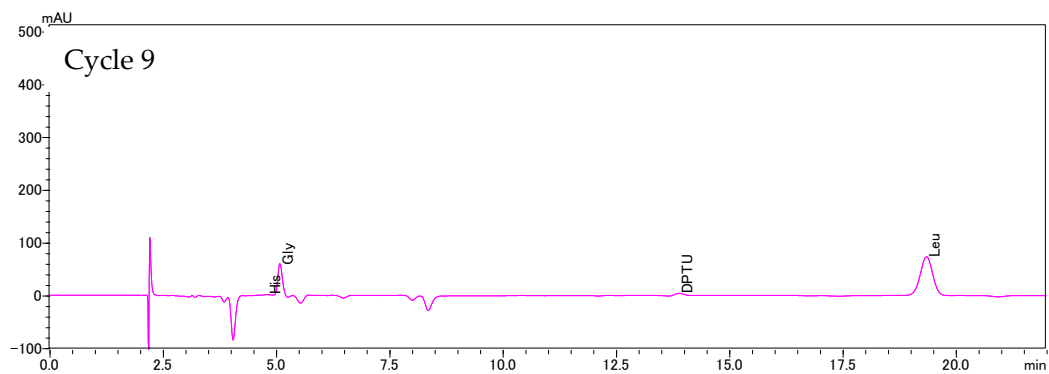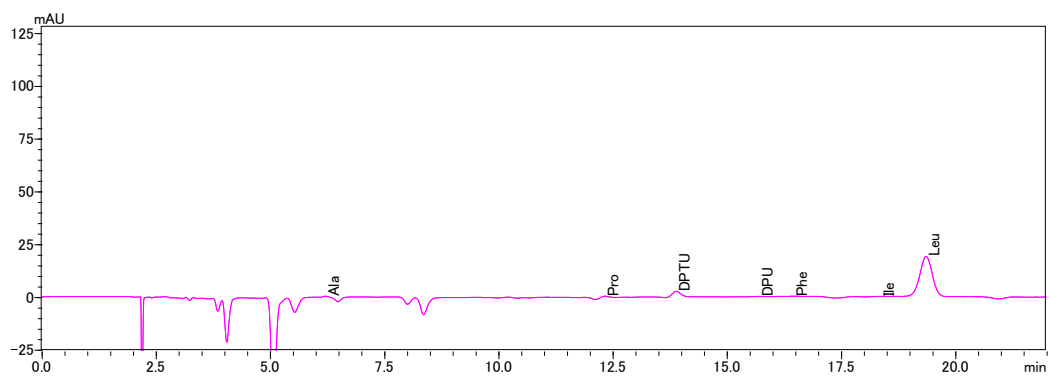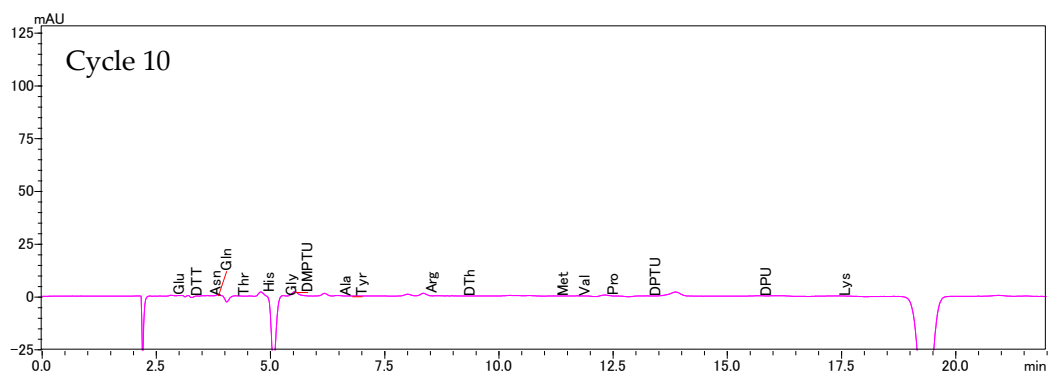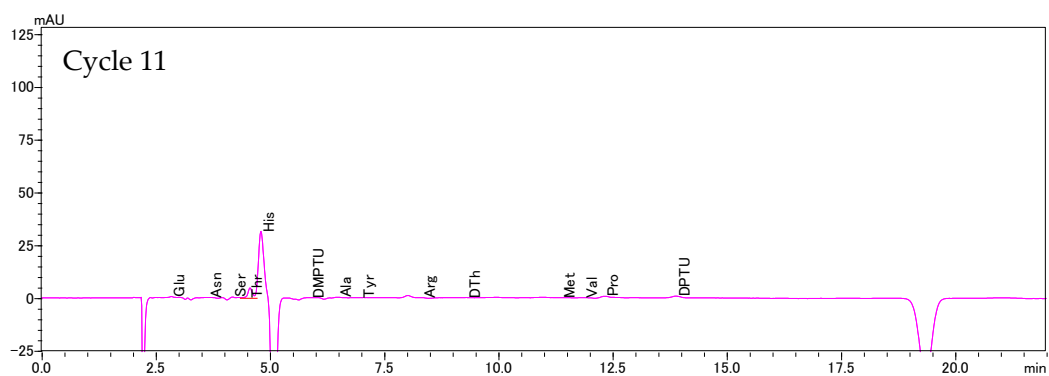

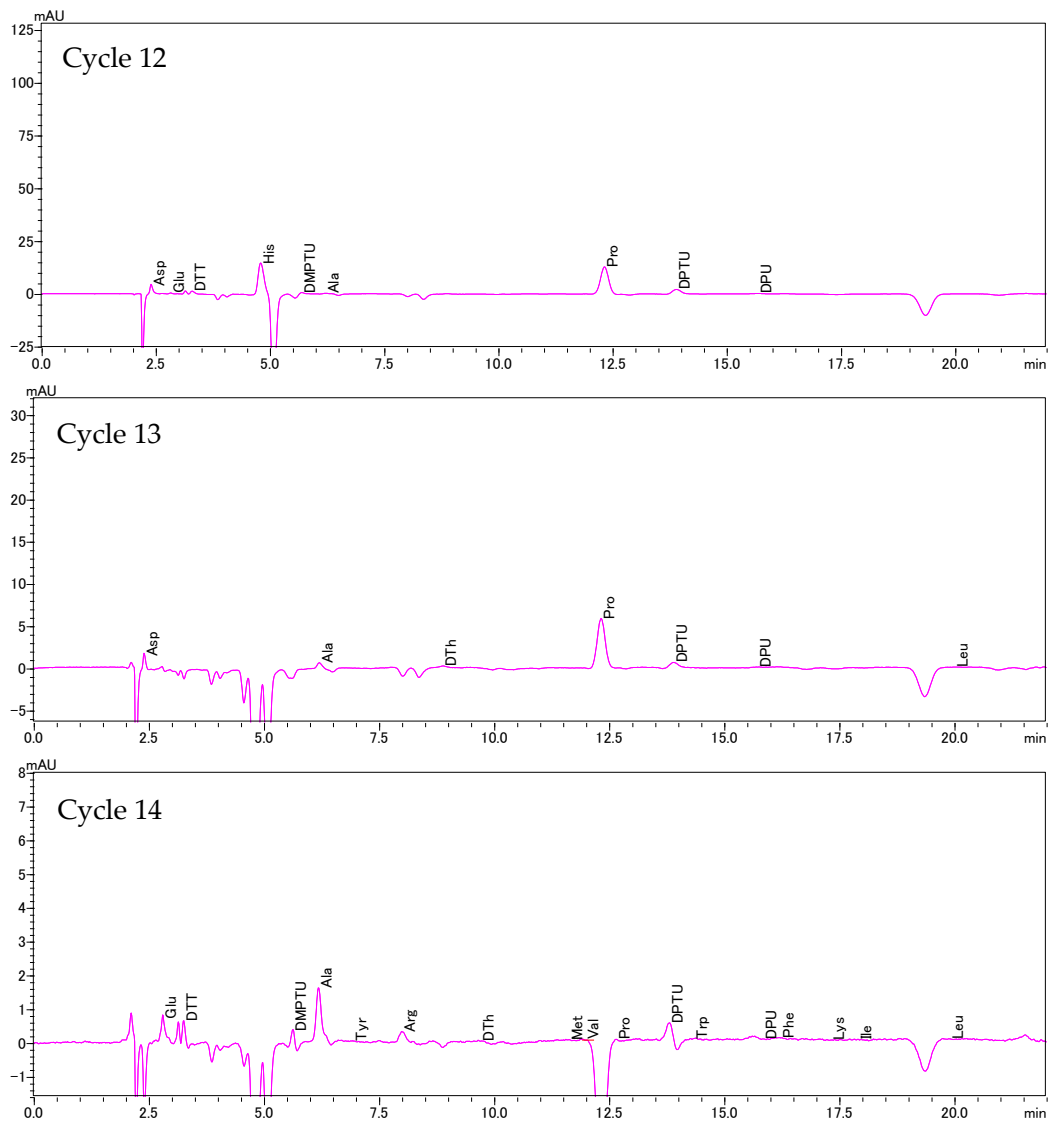

**Figure S3.** HPLC chromatograms of the amino acids released from each Edman degradation cycle of Mr3d.1.

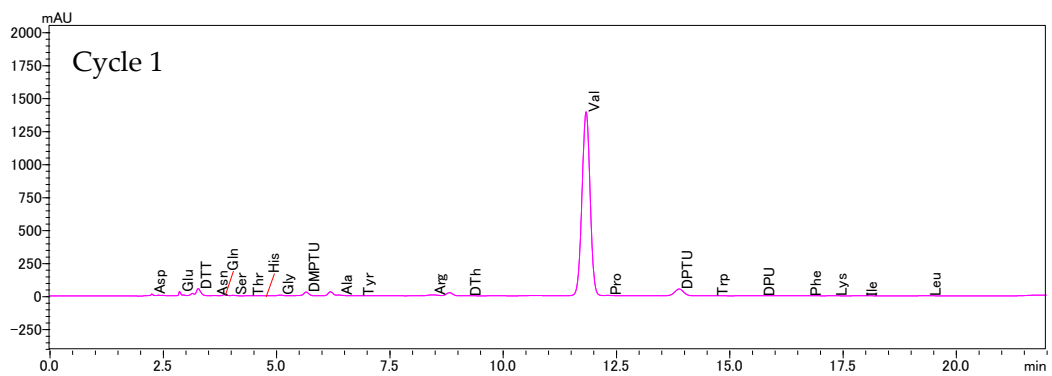

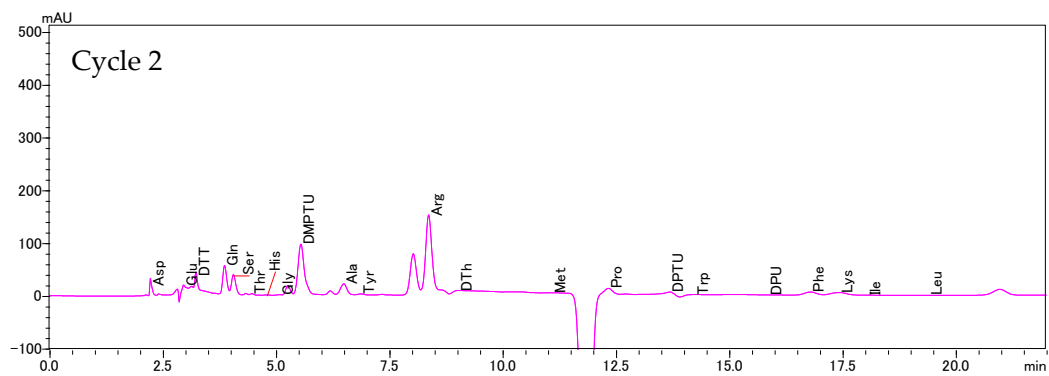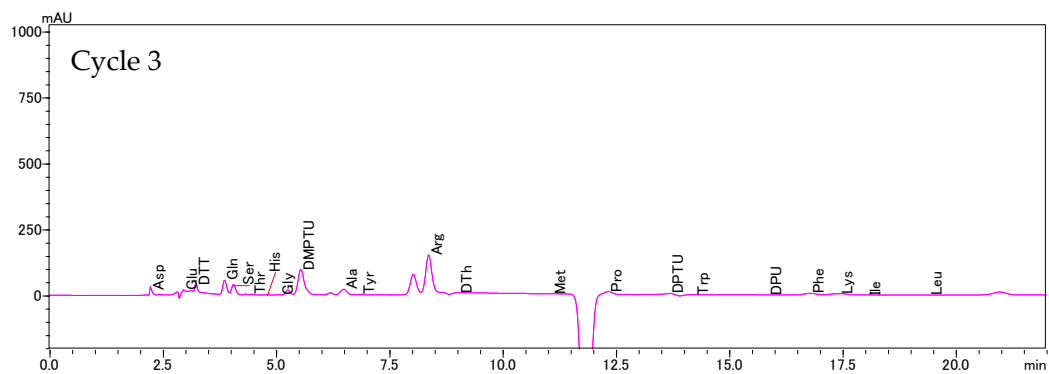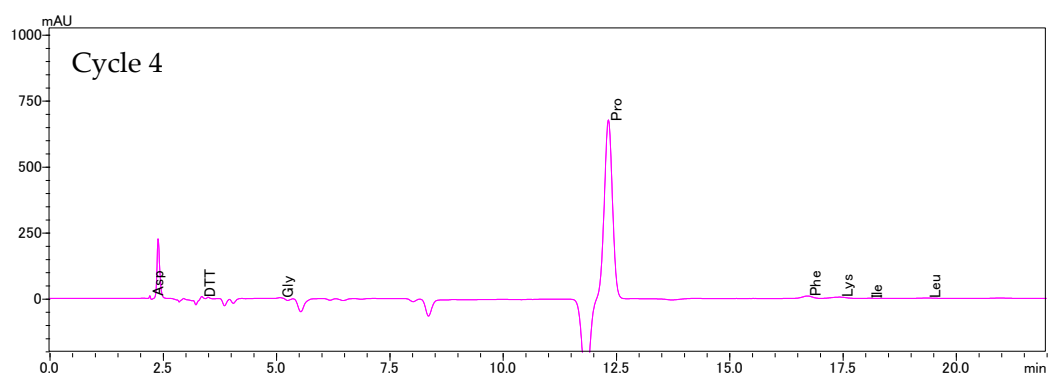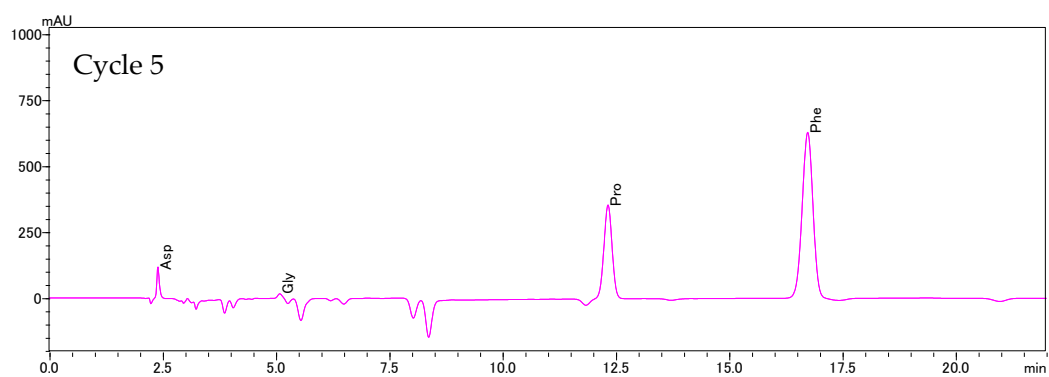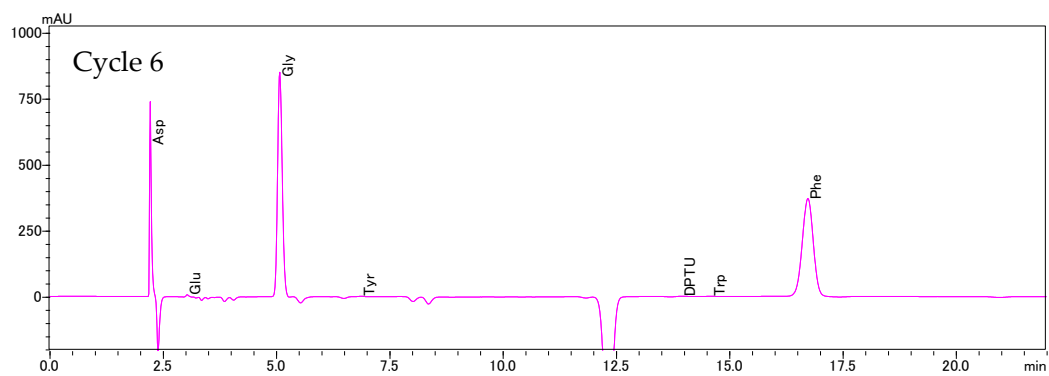

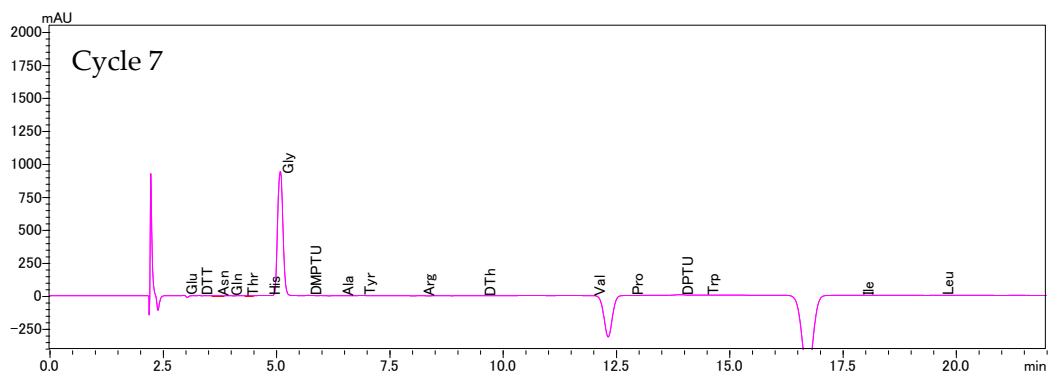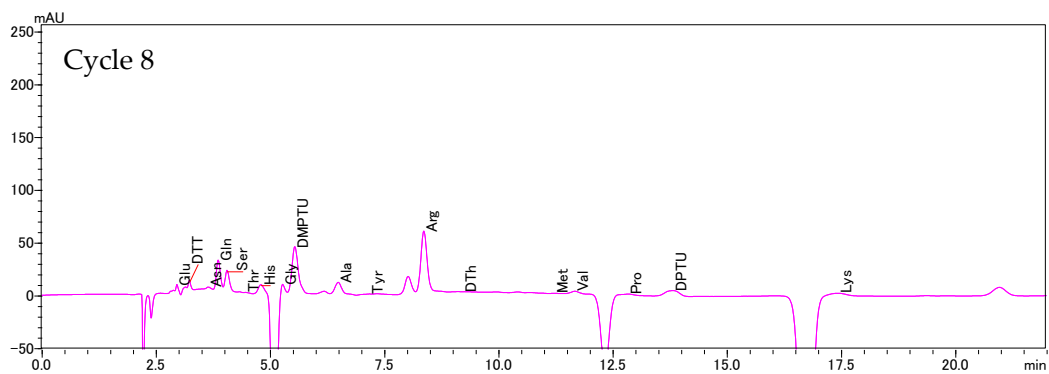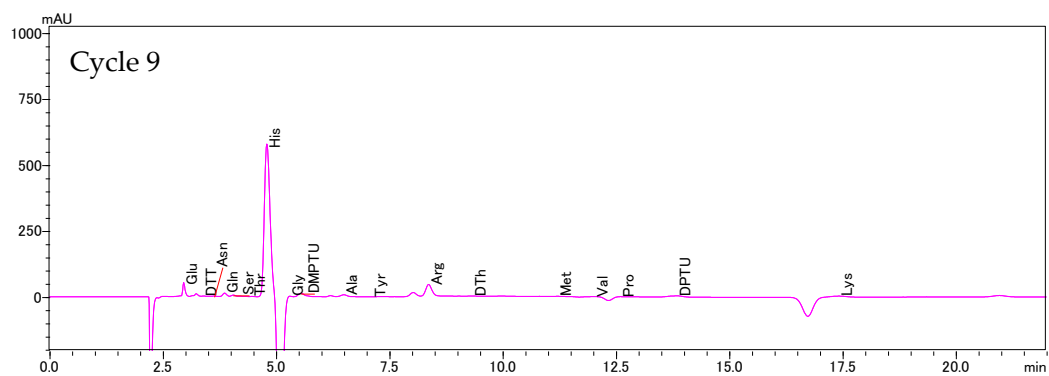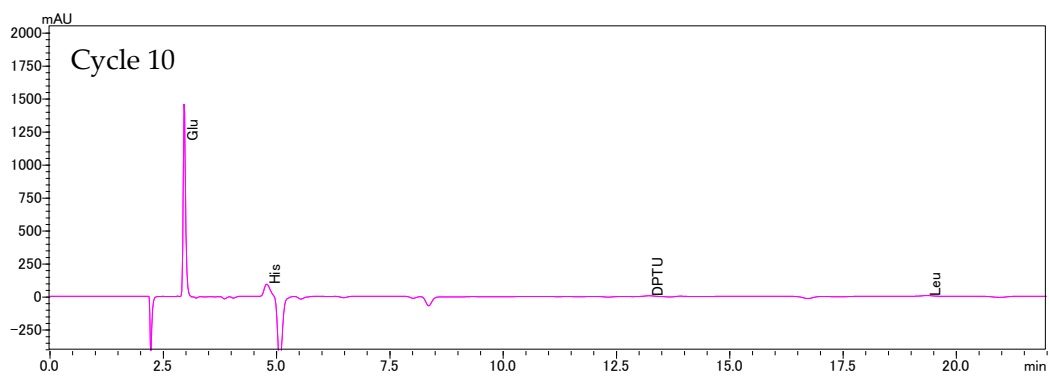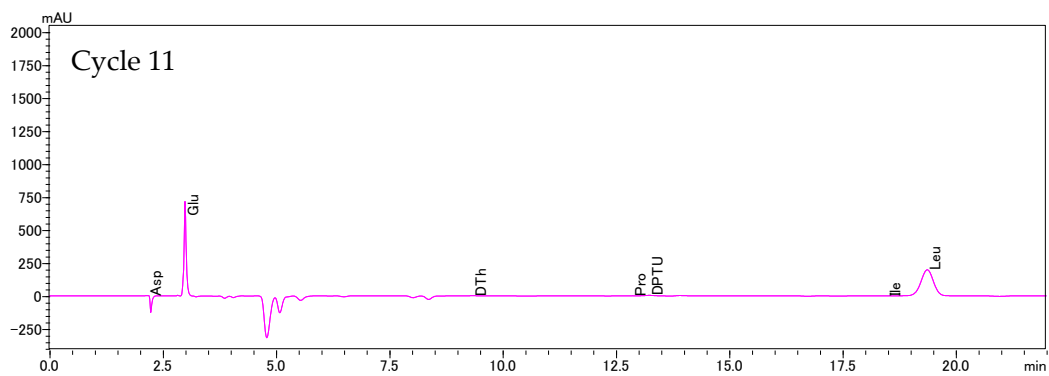

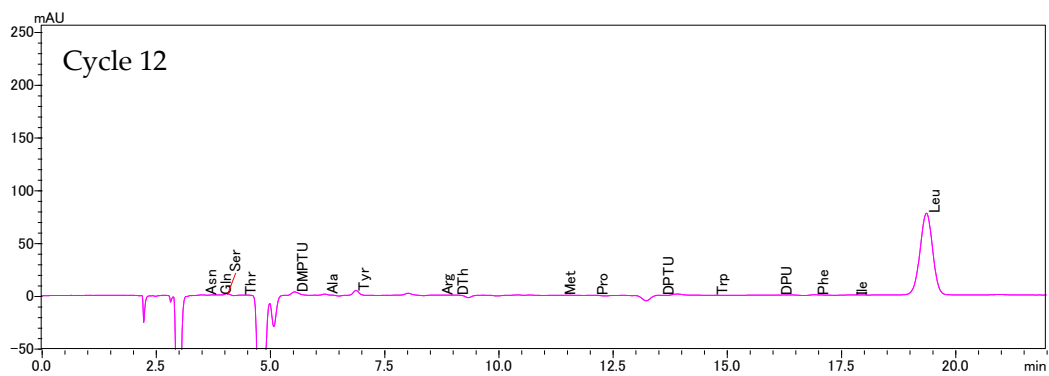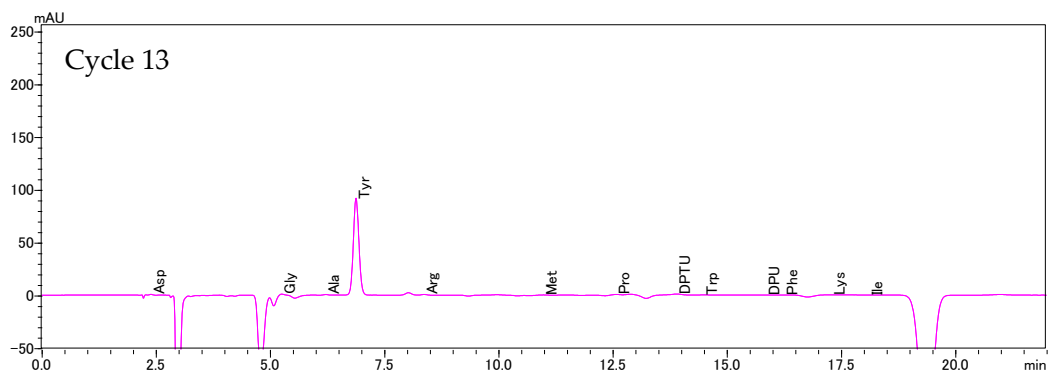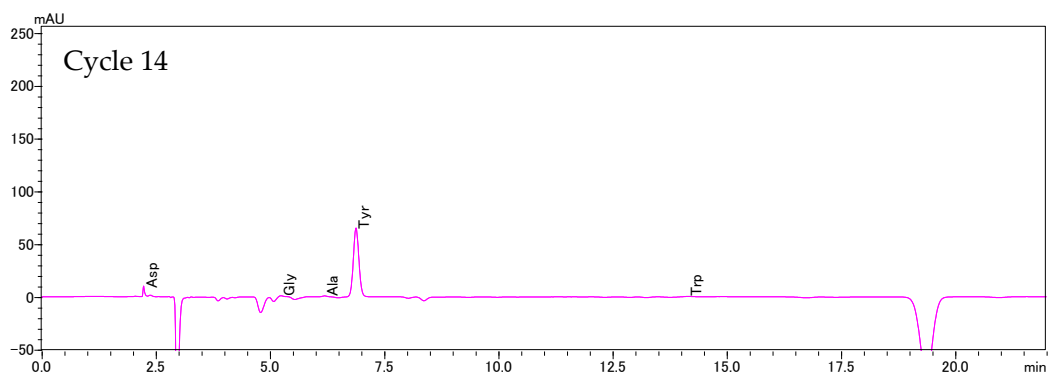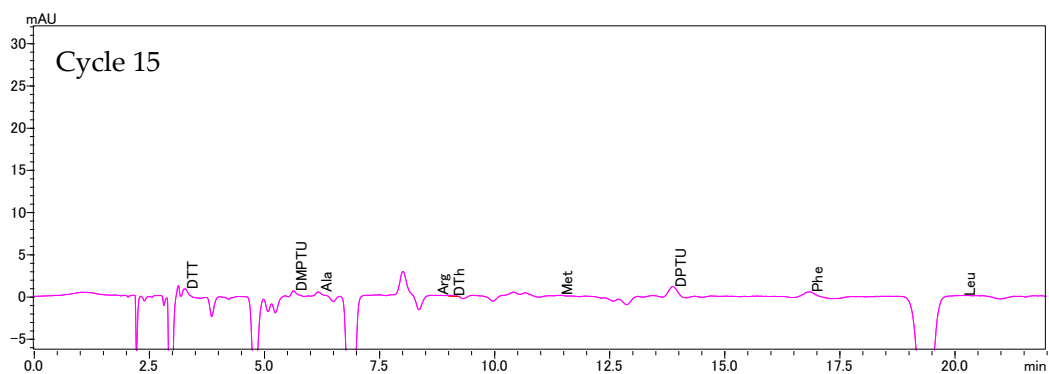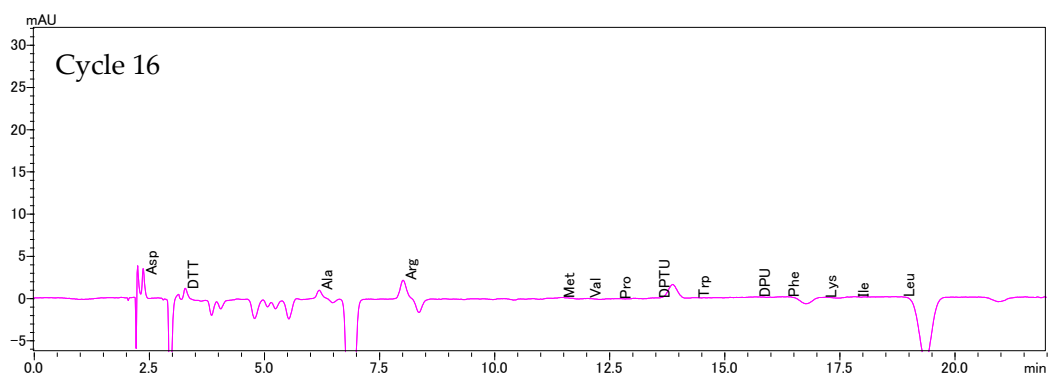

**Figure S4.** HPLC chromatograms of the amino acids released from each Edman degradation cycle of Mr3e.1.

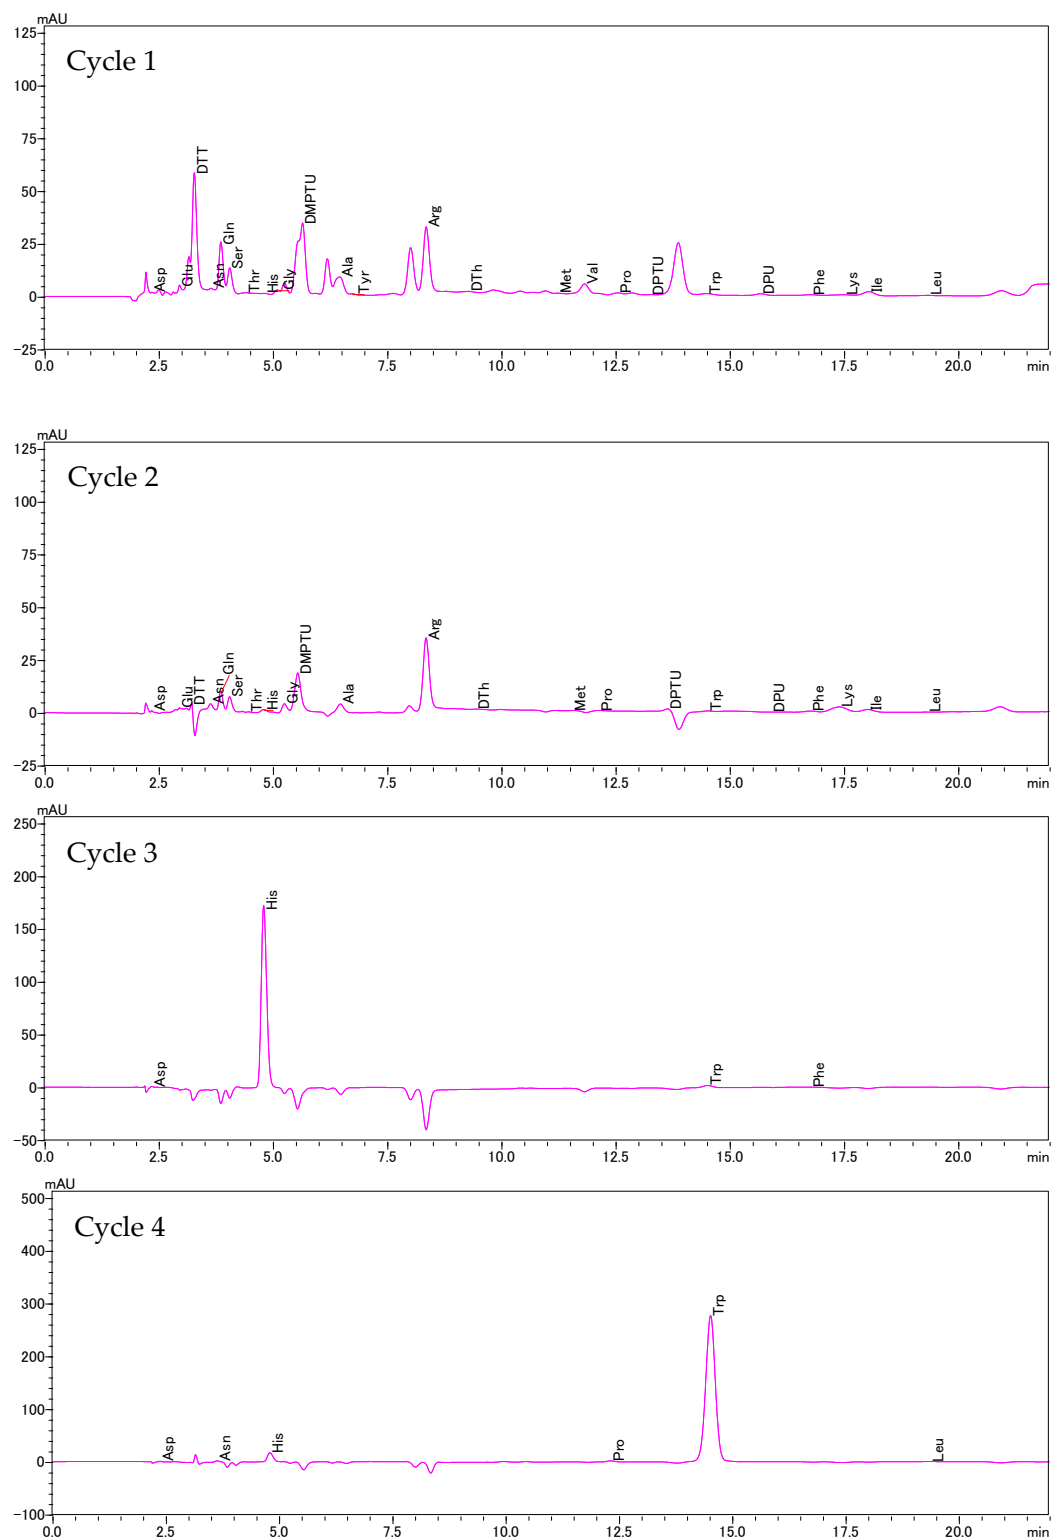



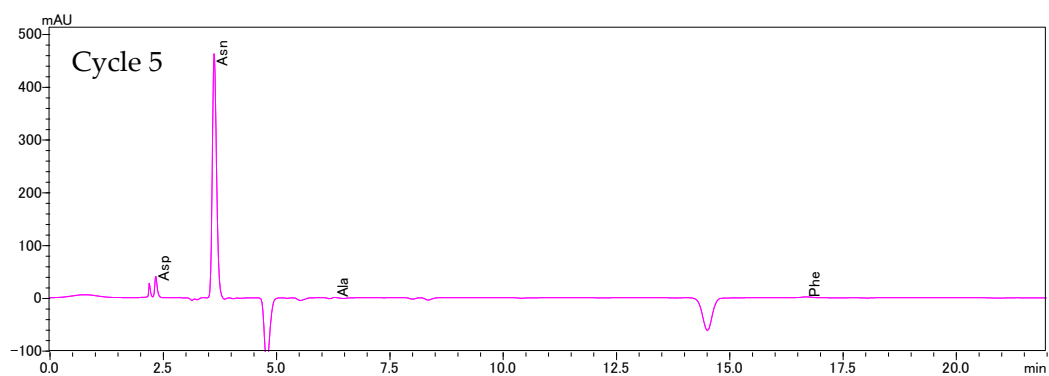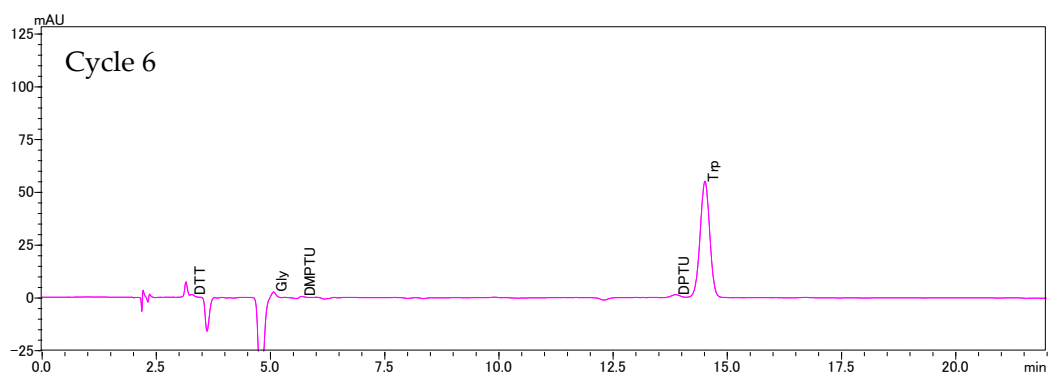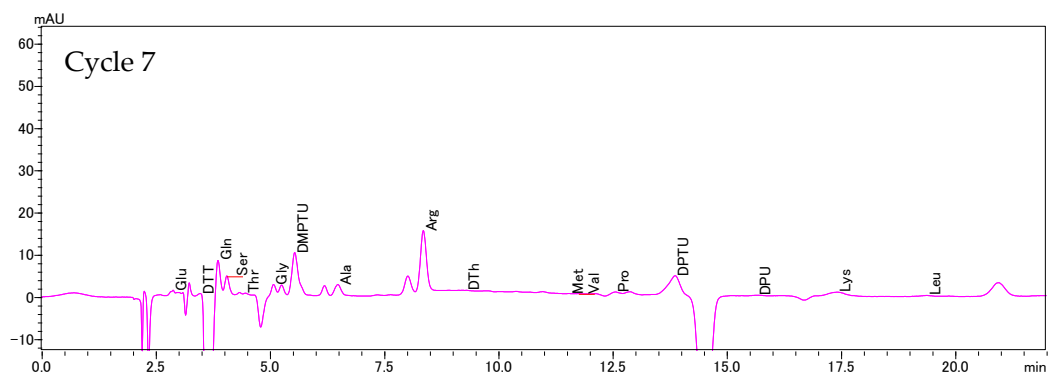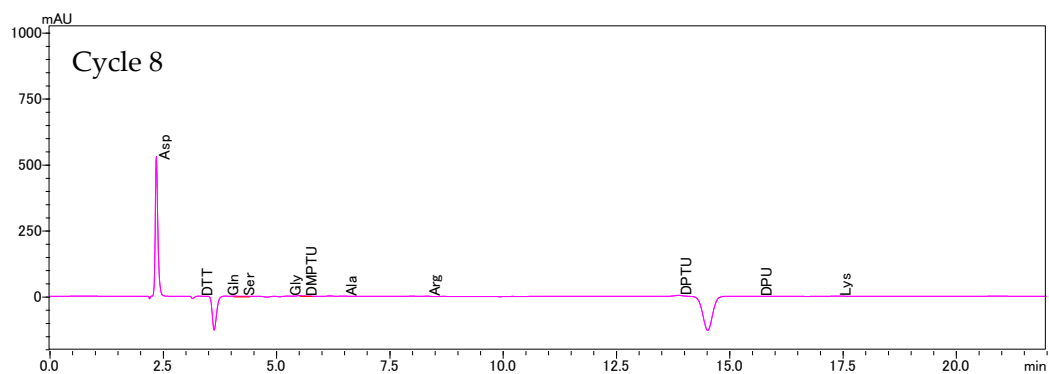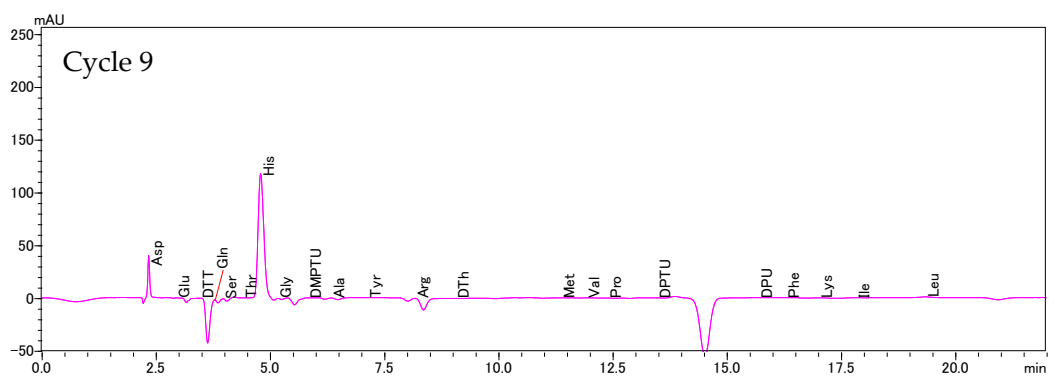

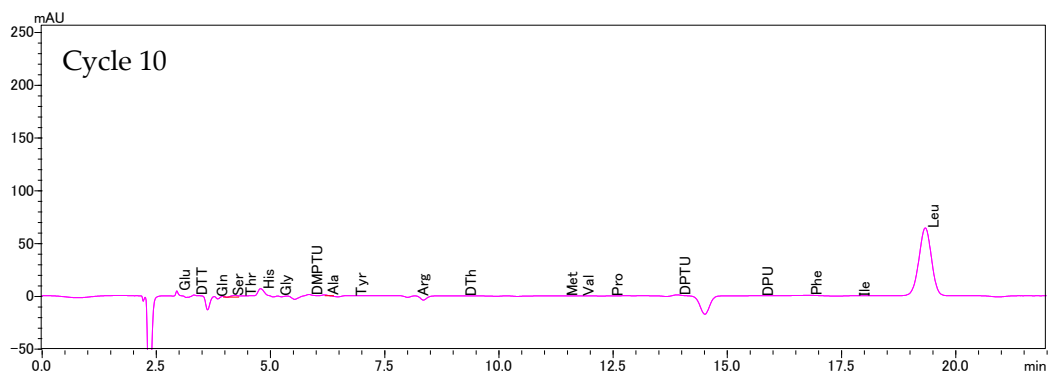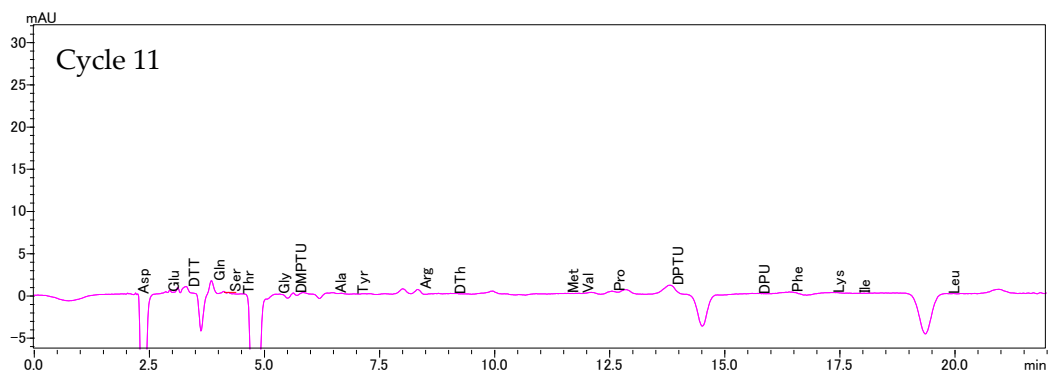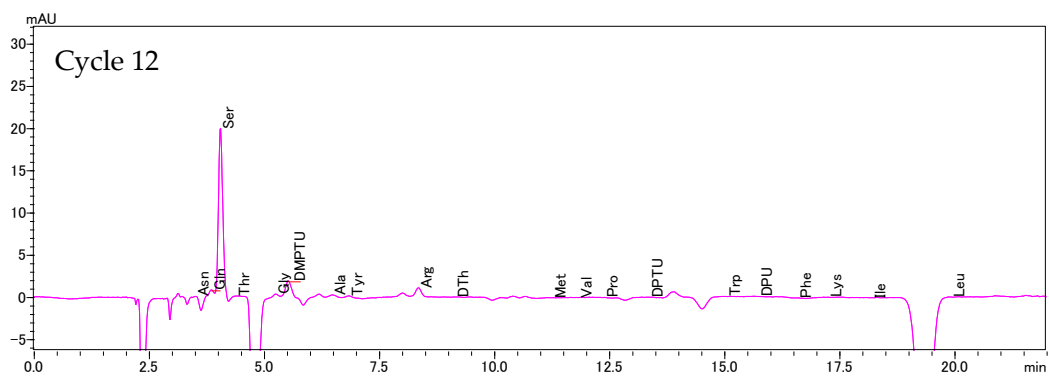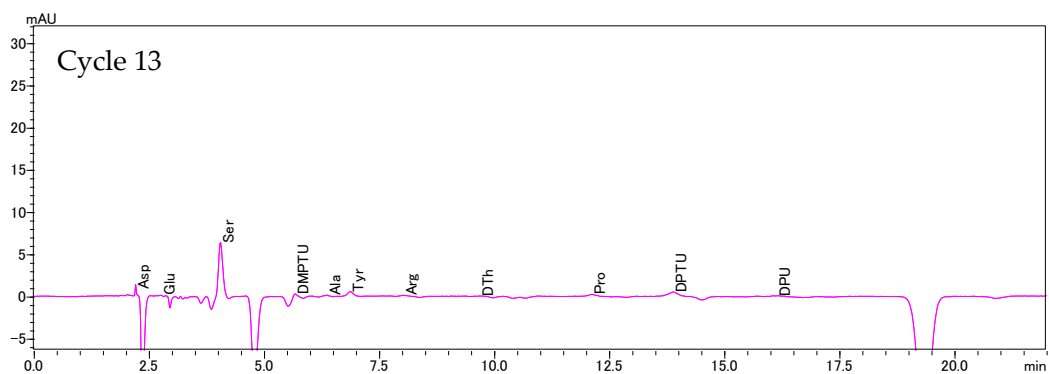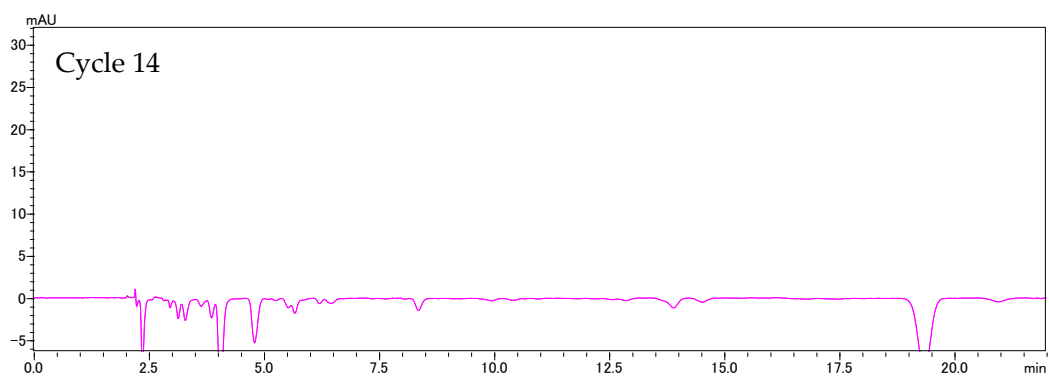

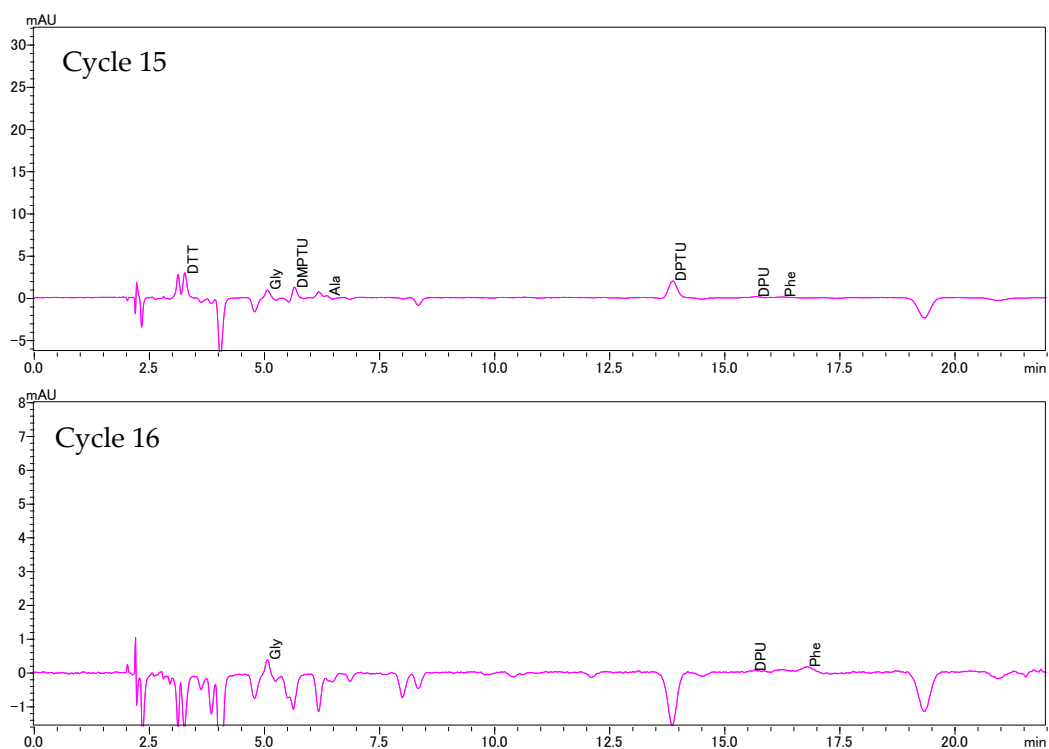

**Figure S5.** HPLC chromatograms of the amino acids released from each Edman degradation cycle of Mr3.8.

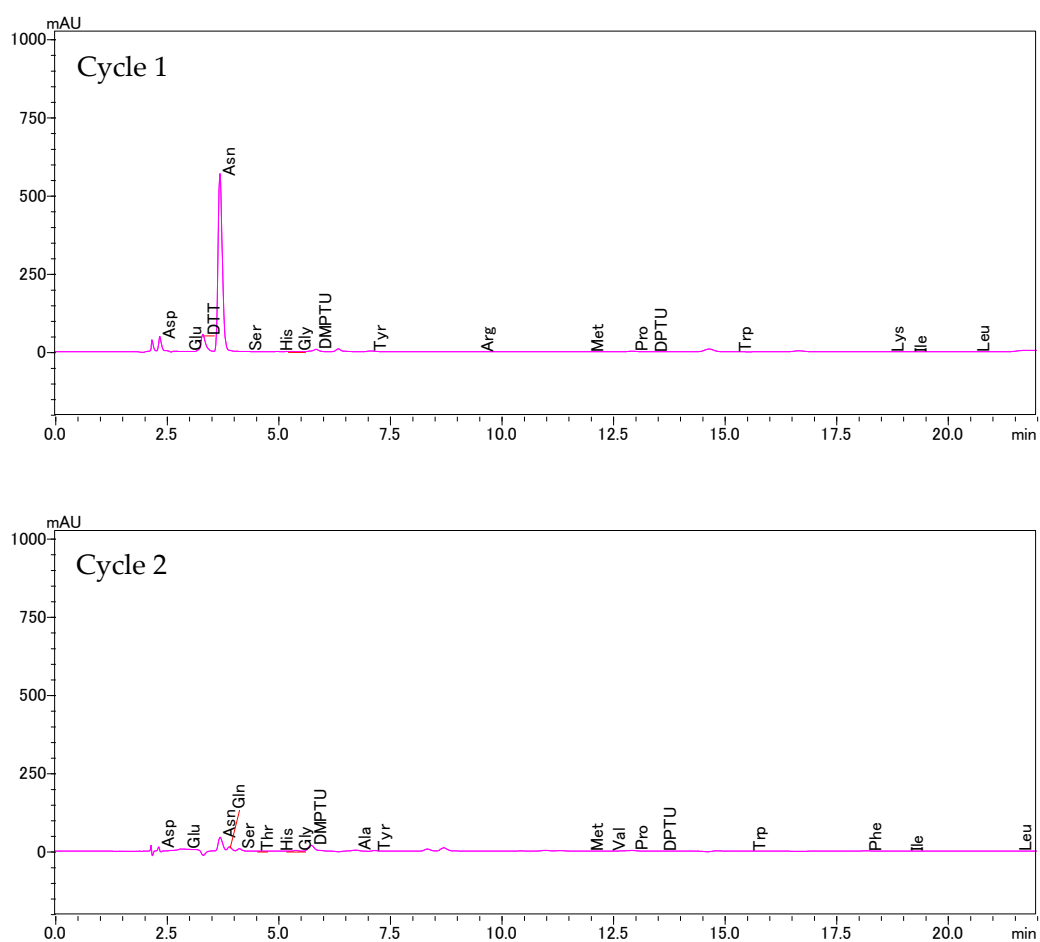

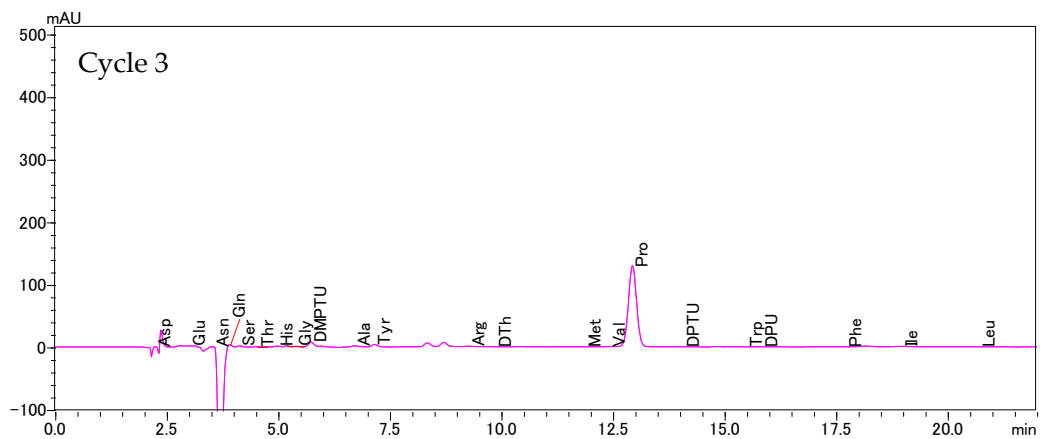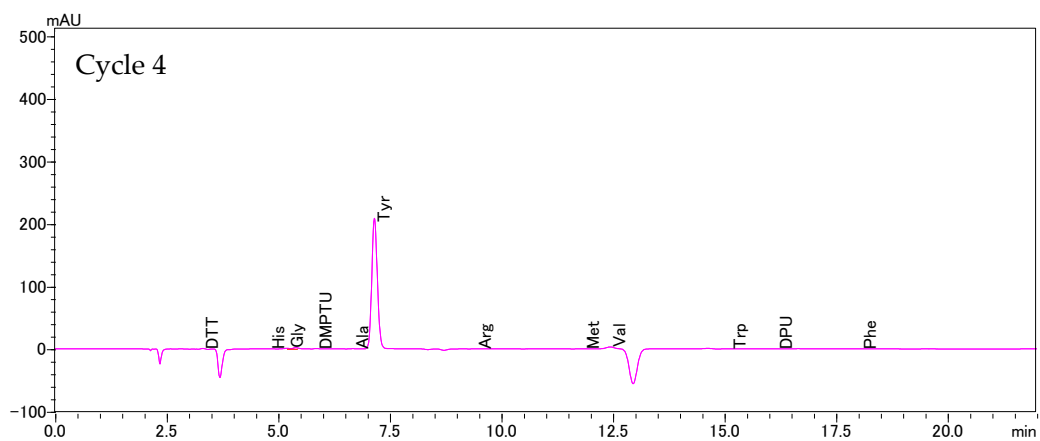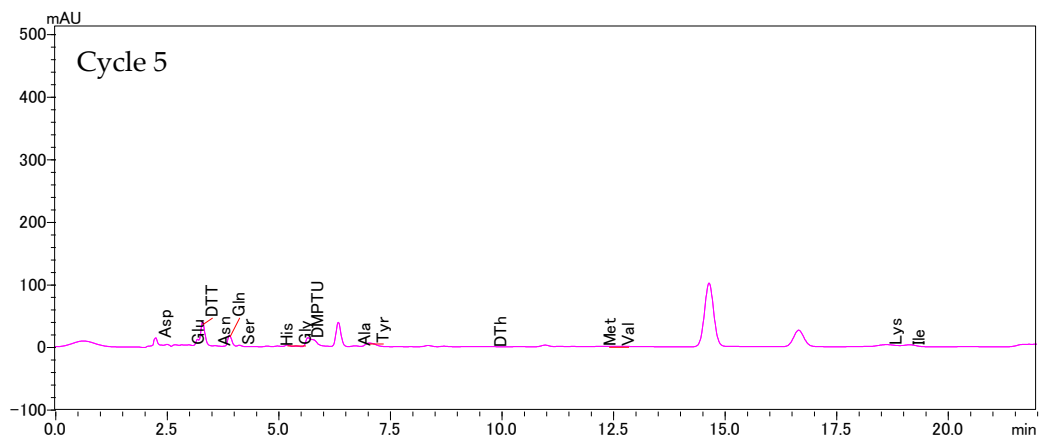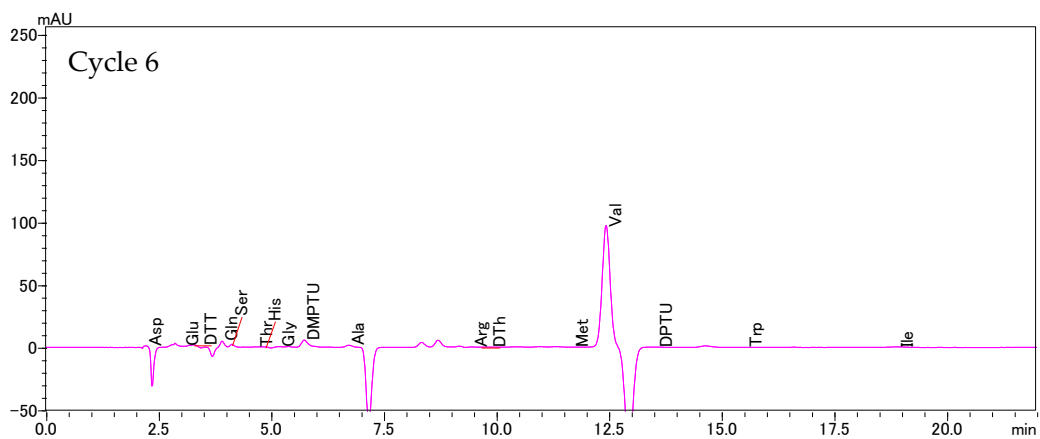

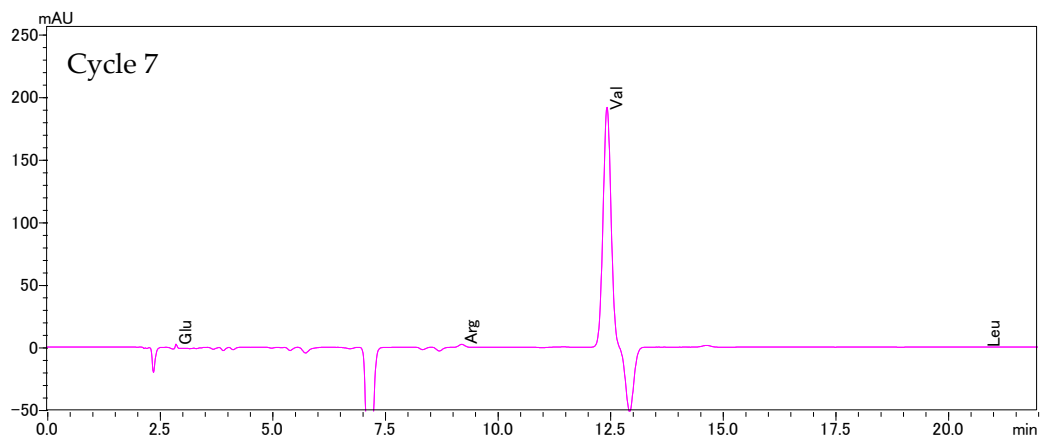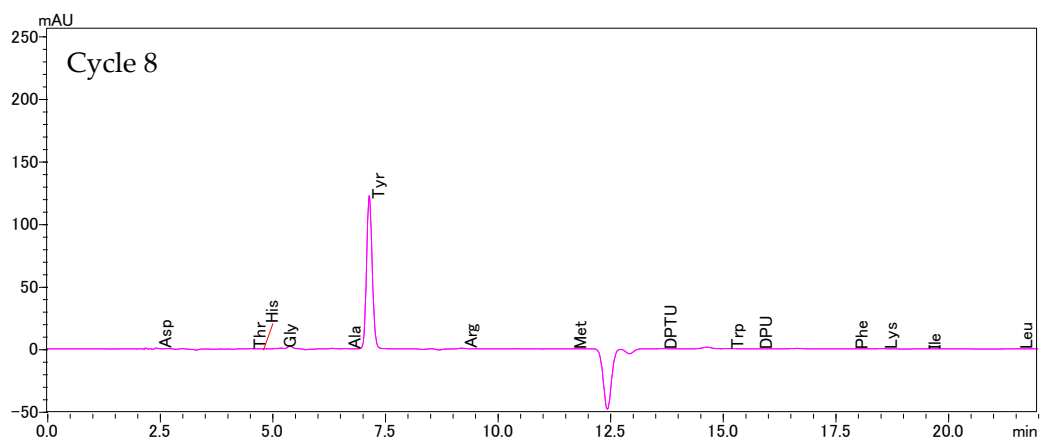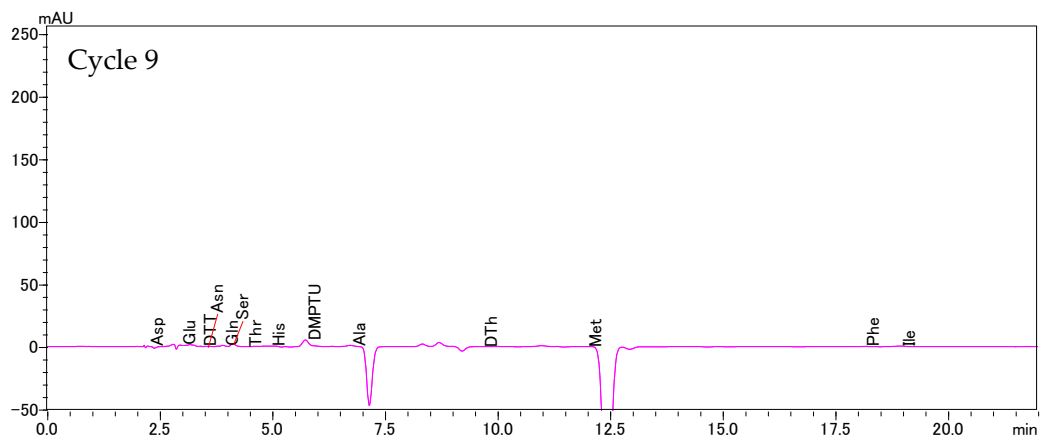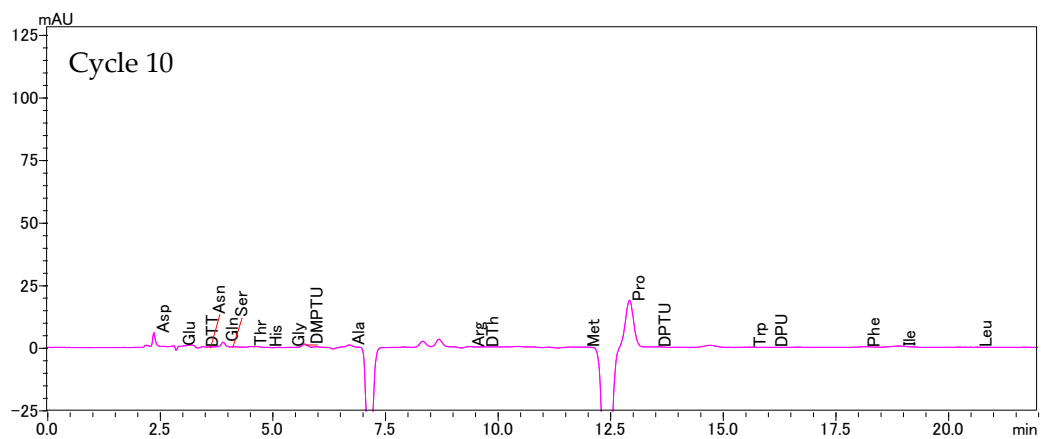

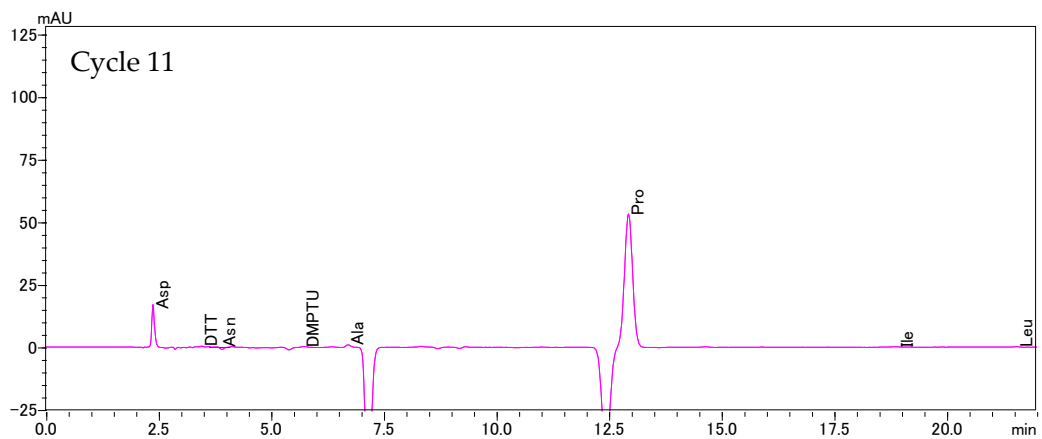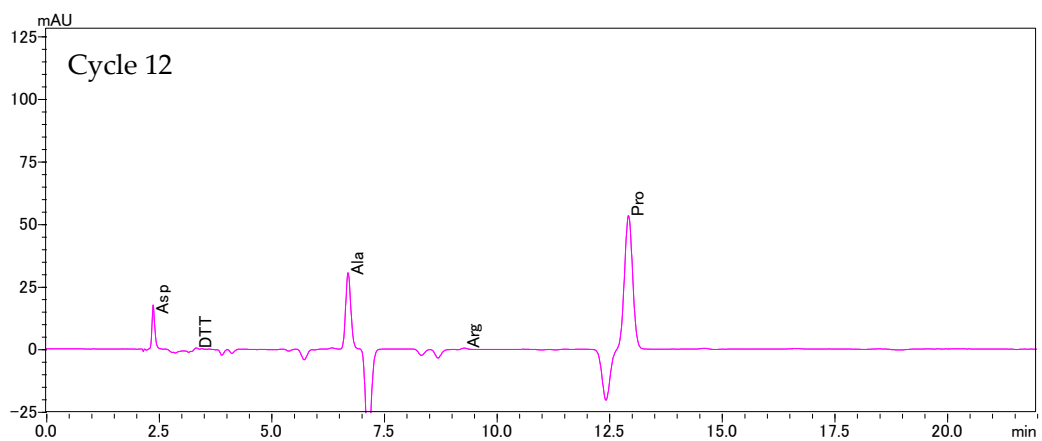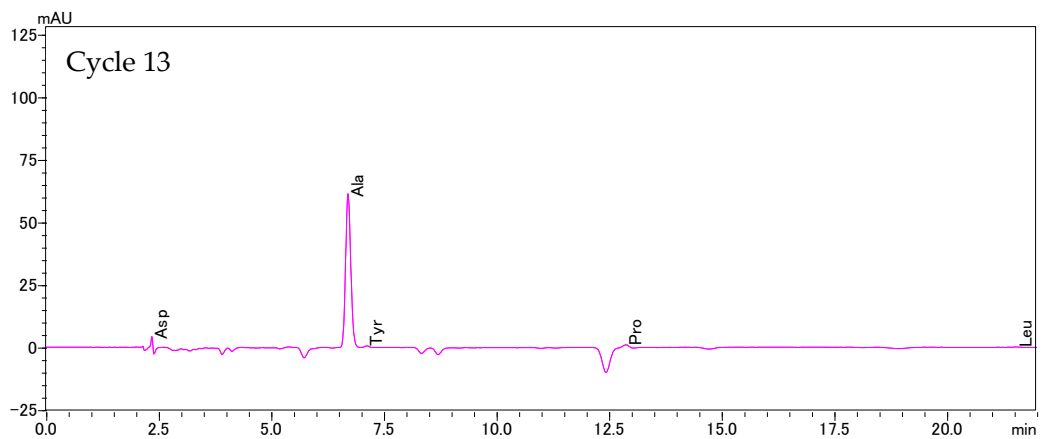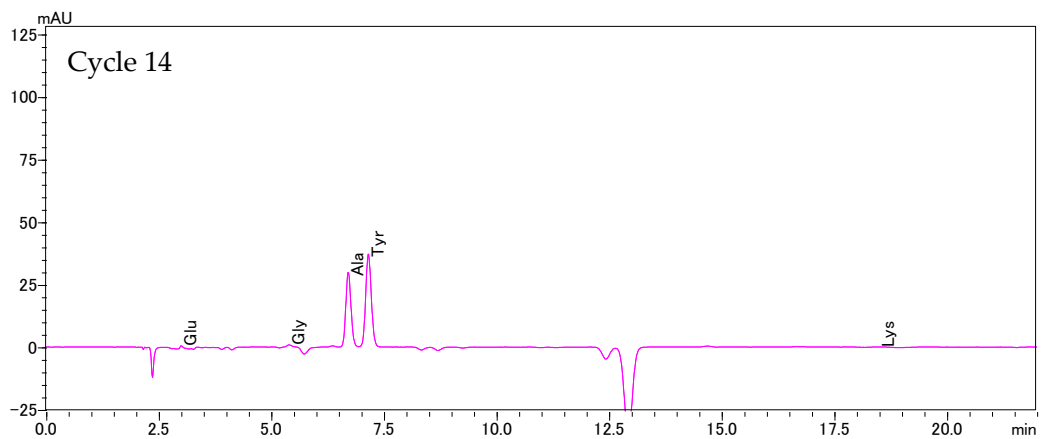

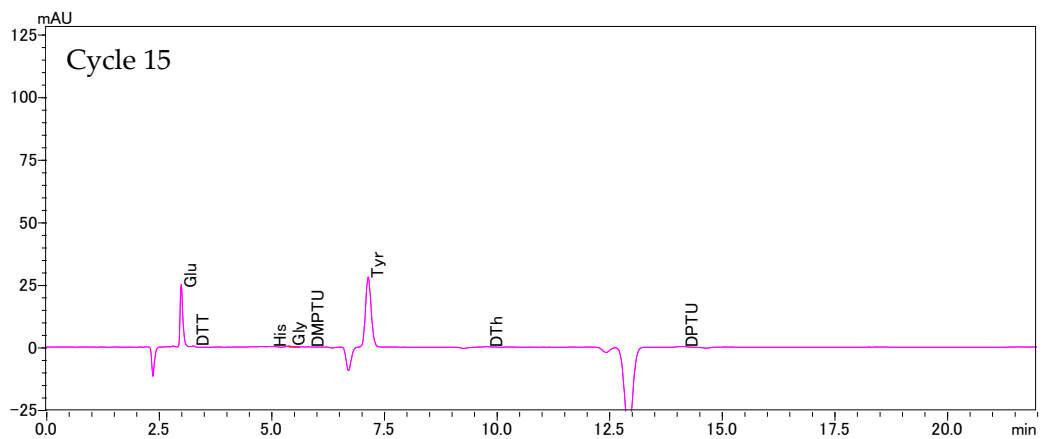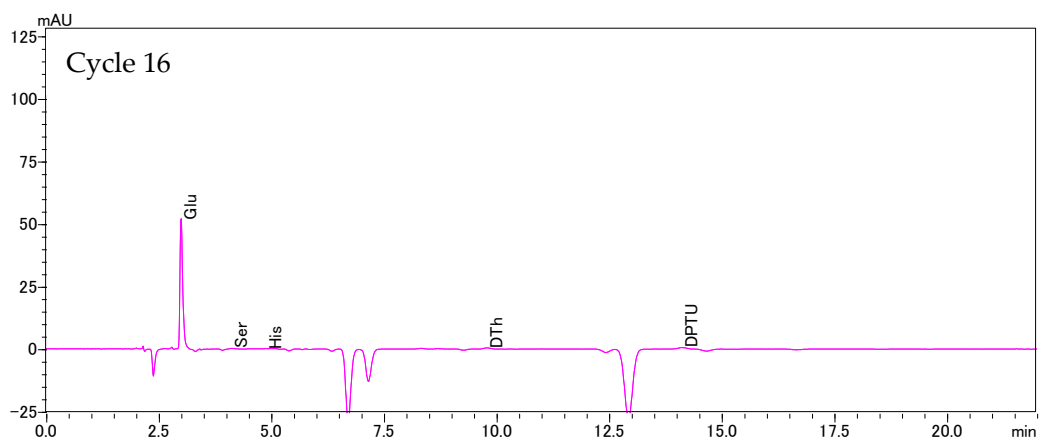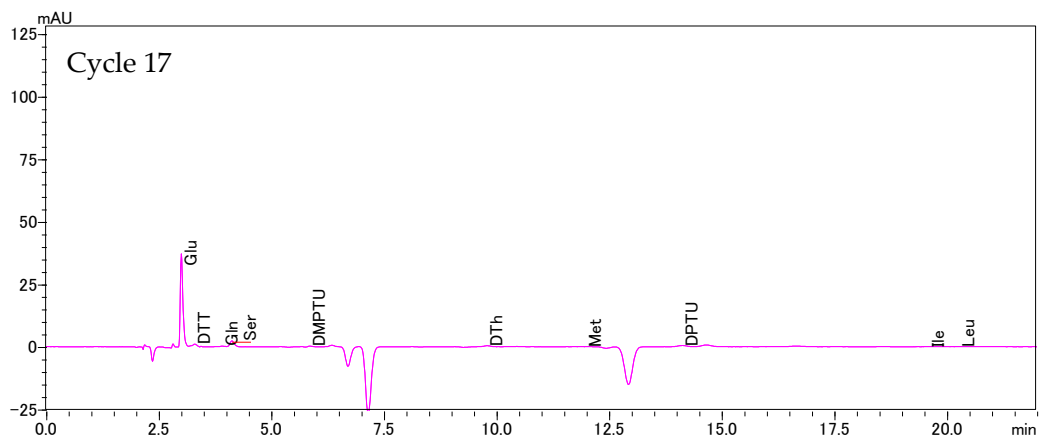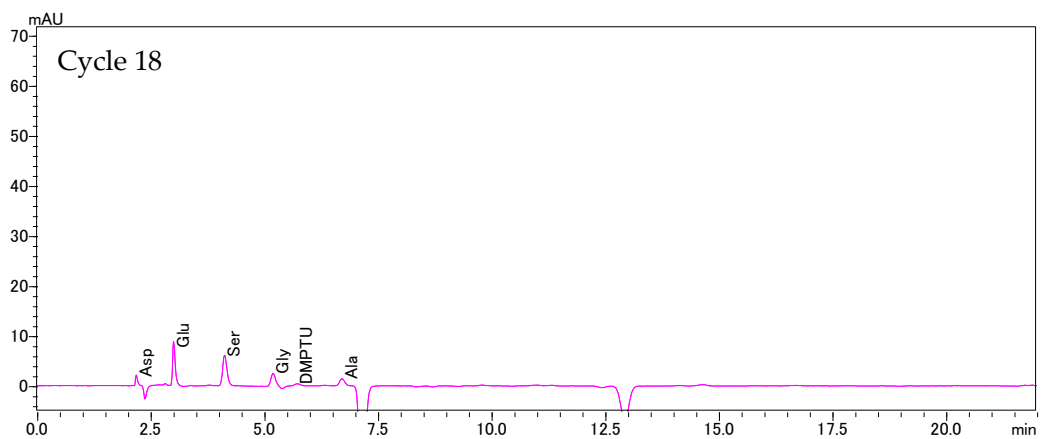

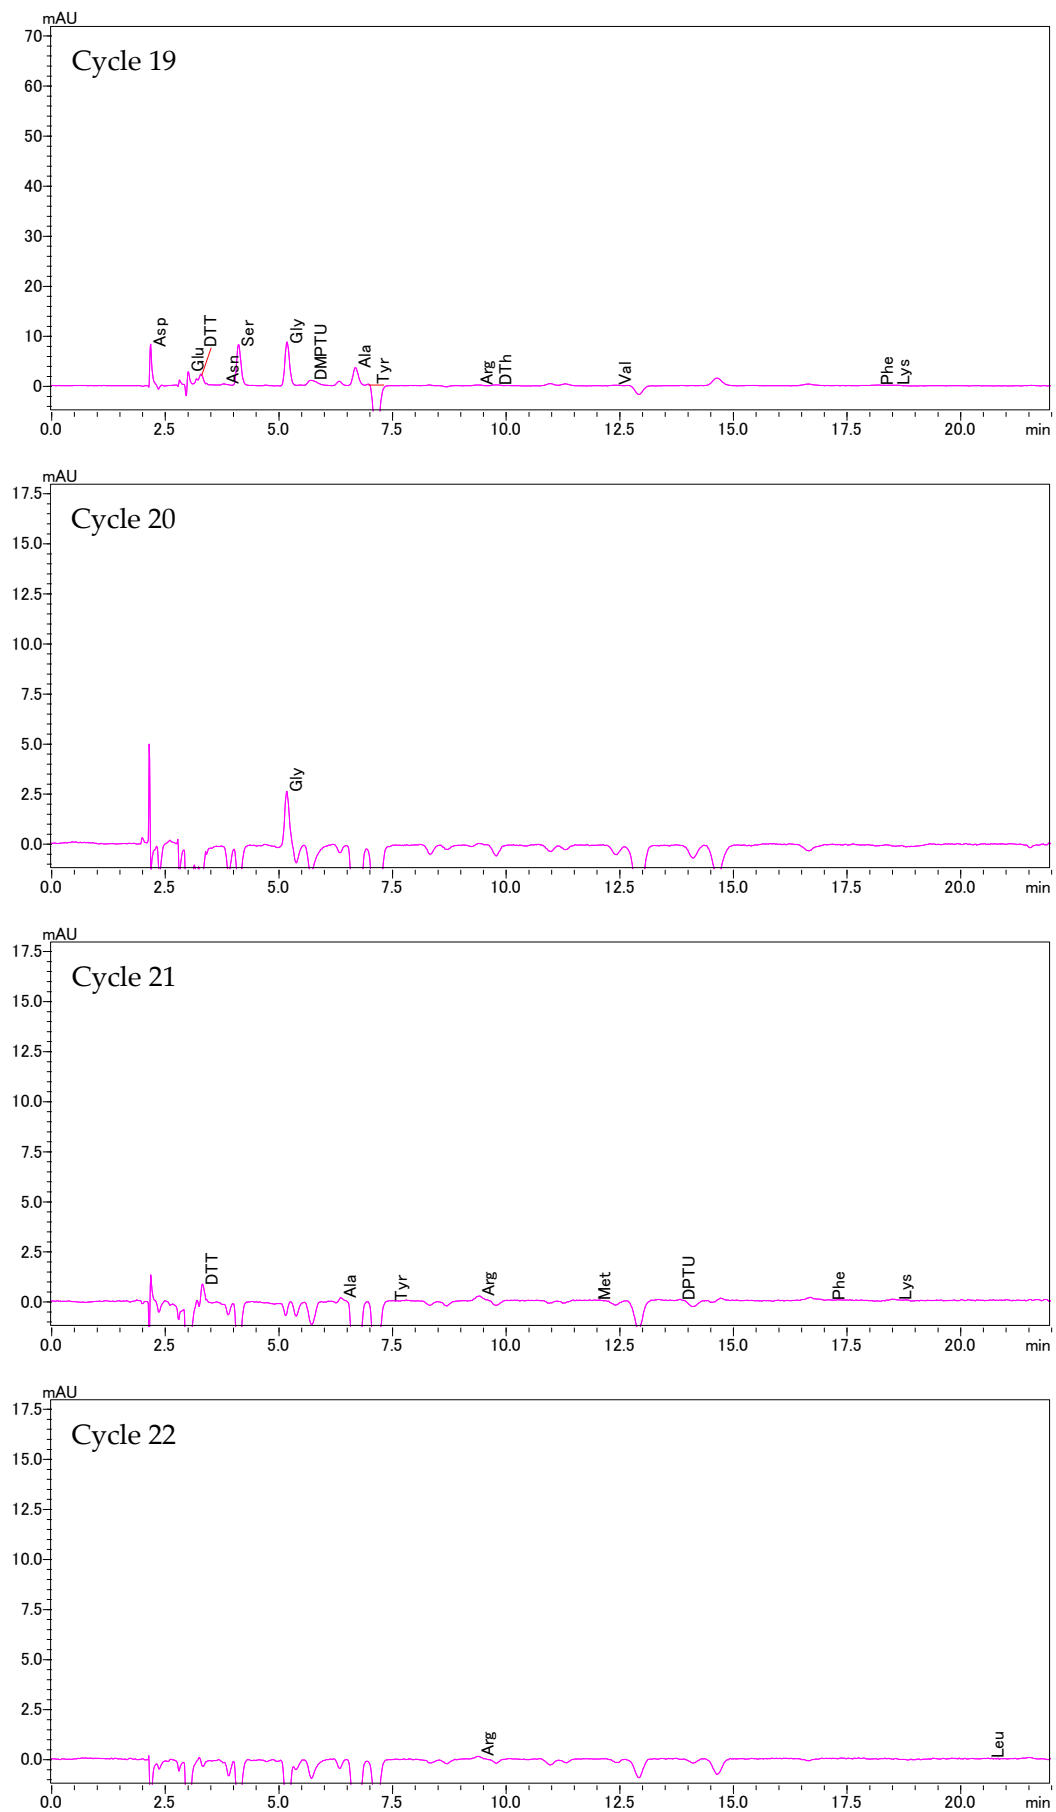

**Figure S6.** HPLC chromatograms of the amino acids released from each Edman degradation cycle of TCP.
